# Supplementary material
Source: ML conference proceedings conference paper supplement (https://openaccess.thecvf.com/content/cvpr_2017/html/Nah_Deep_Multi-Scale_Convolutional_2017_CVPR_paper.html)
Supplement: Supplementary file 1 [file Nah_Deep_Multi-Scale_Convolutional_2017_CVPR_supplemental.zip]

# Deep Multi-scale Convolutional Neural Network for Dynamic Scene Deblurring

Seungjun Nah, Tae Hyun Kim, Kyoung Mu Lee

CVPR 2017

Supplementary Material – Deblurring Result Comparison

# Deblurring Result Comparison of Loss terms

# Loss Comparison

- Multi-scale content loss

- $\mathcal{L}_{cont} = \frac{1}{2K} \sum_{k=1}^K \frac{1}{c_k w_k h_k} ||L_k - S_k||^2$

- Adversarial loss

- $\mathcal{L}_{adv} = \mathbb{E}_{S \sim p_{sharp}(S)} [\log D(S)] + \mathbb{E}_{B \sim p_{blurry}(B)} \left[ \log \left( 1 - D(G(B)) \right) \right]$

- Combined loss

- $\mathcal{L}_{total} = \mathcal{L}_{cont} + \lambda \mathcal{L}_{adv}, \lambda = 1 \times 10^{-4}$

Test Image 1

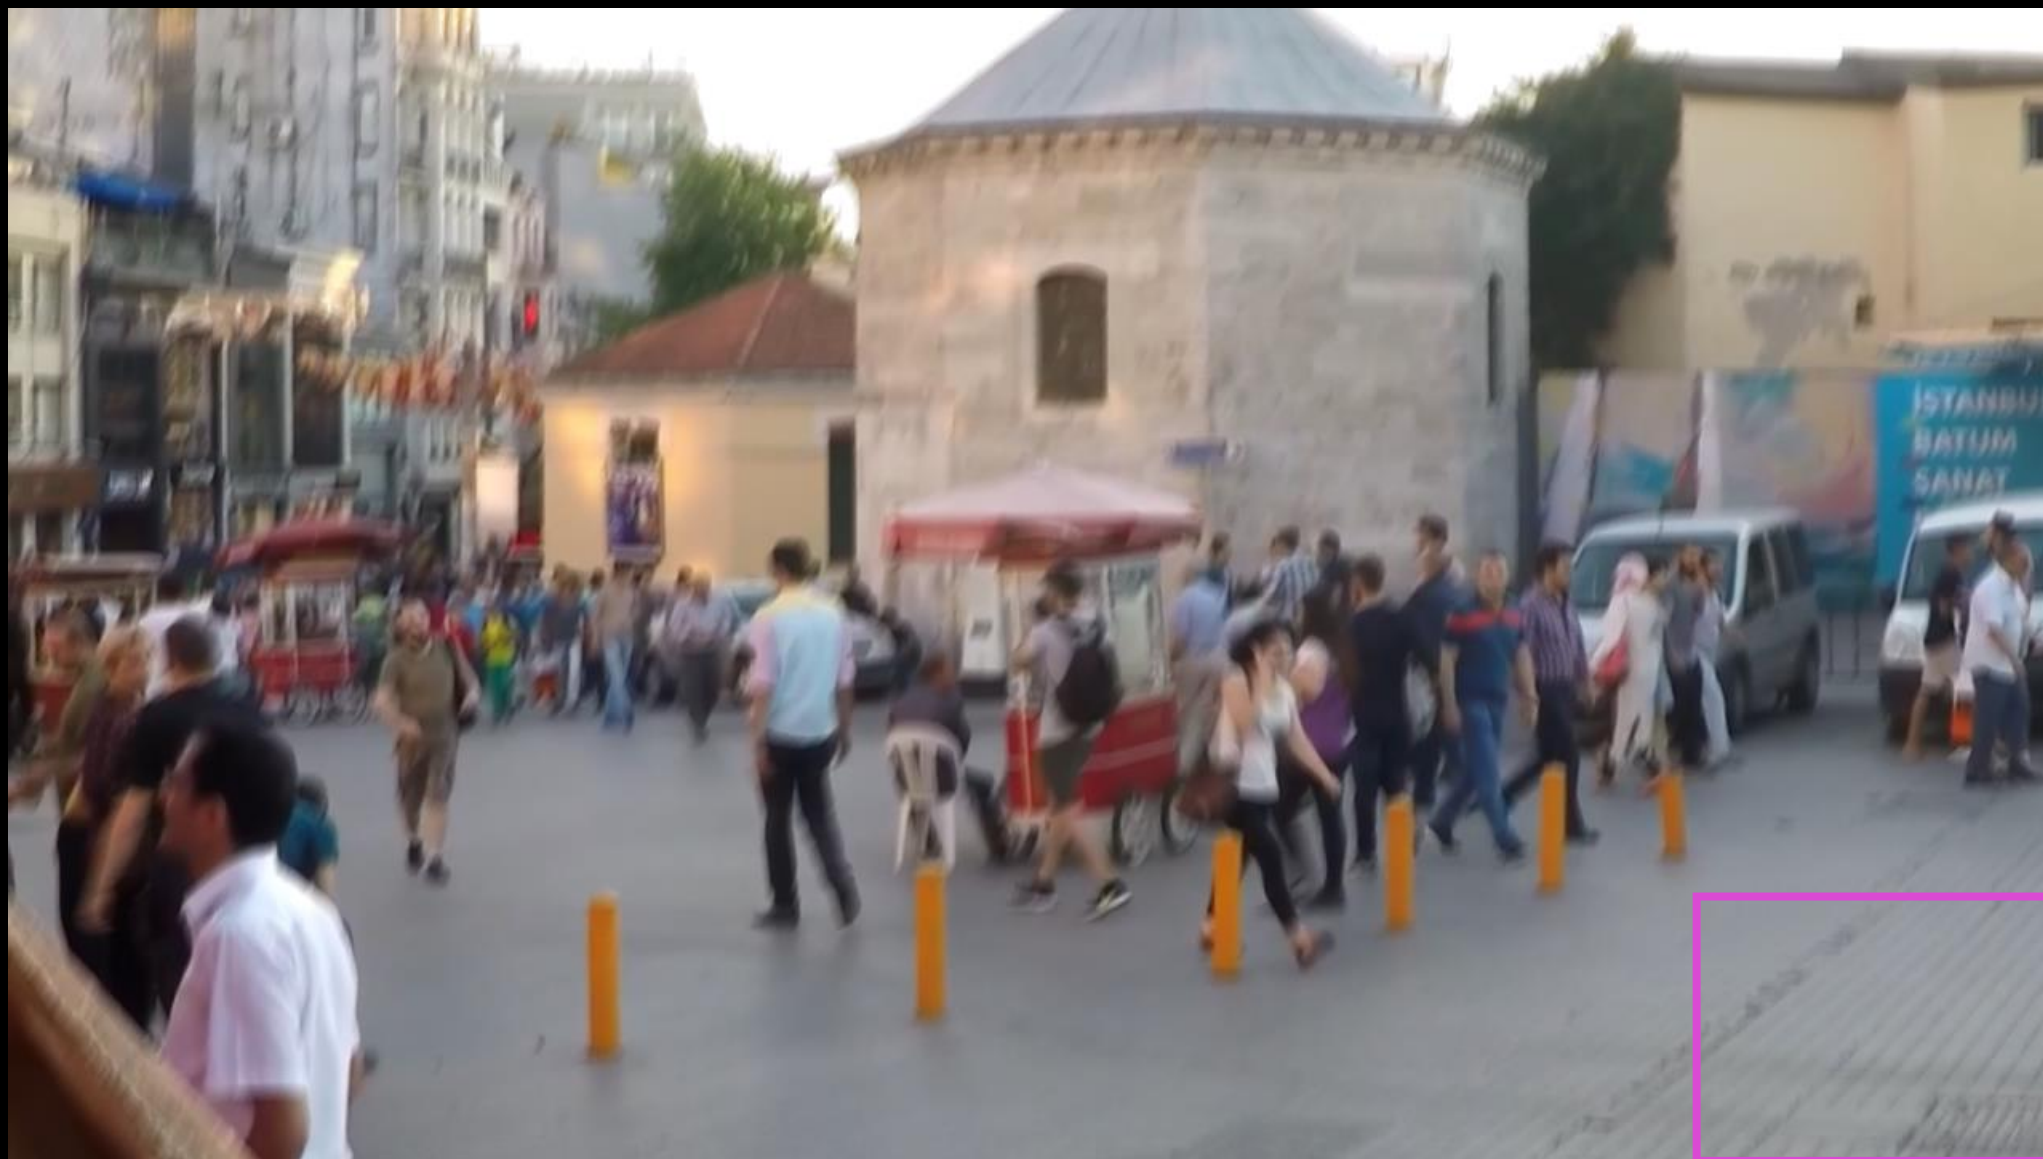

Blurry Input

Test Image 1

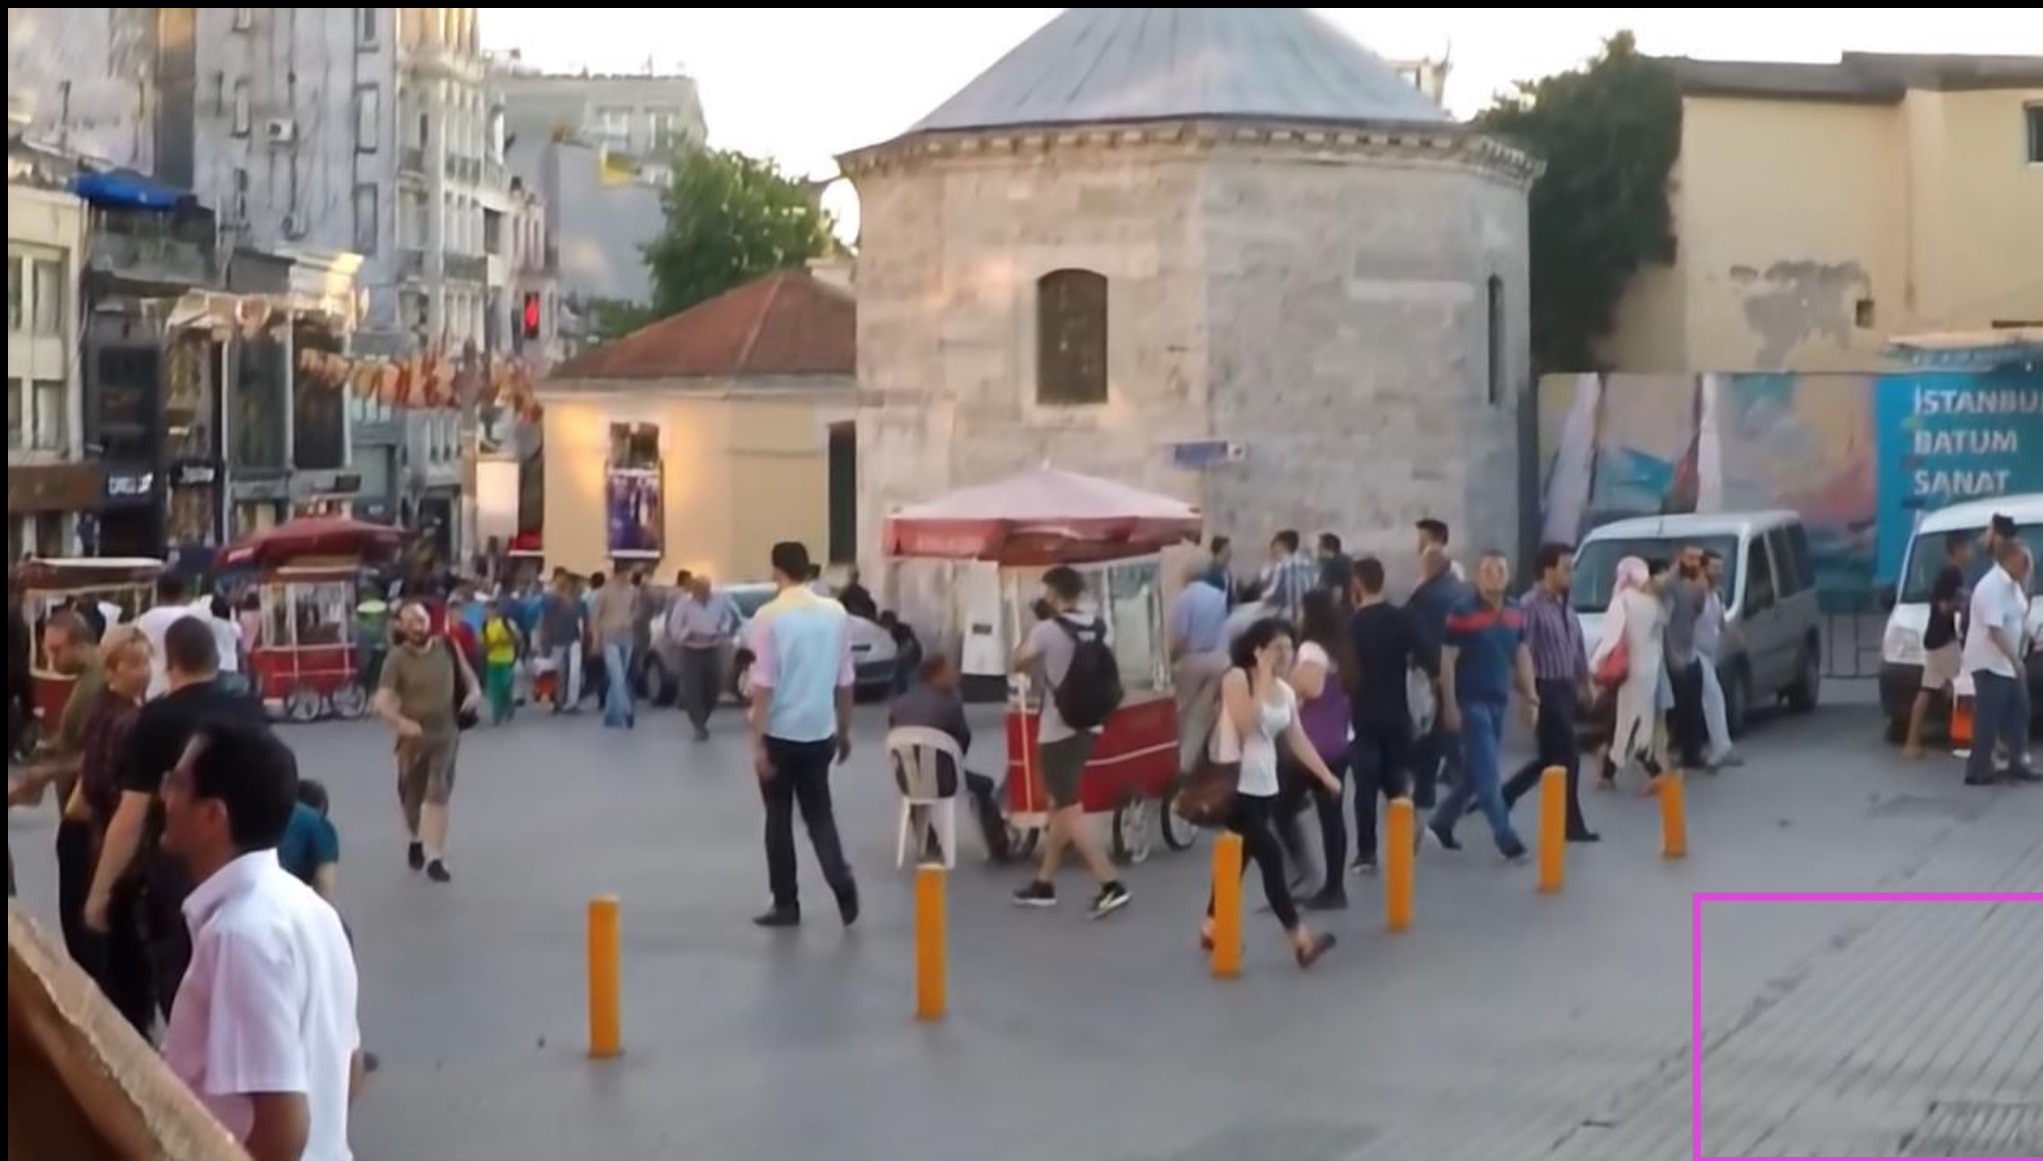

Our Result (MSE)



Test Image 1

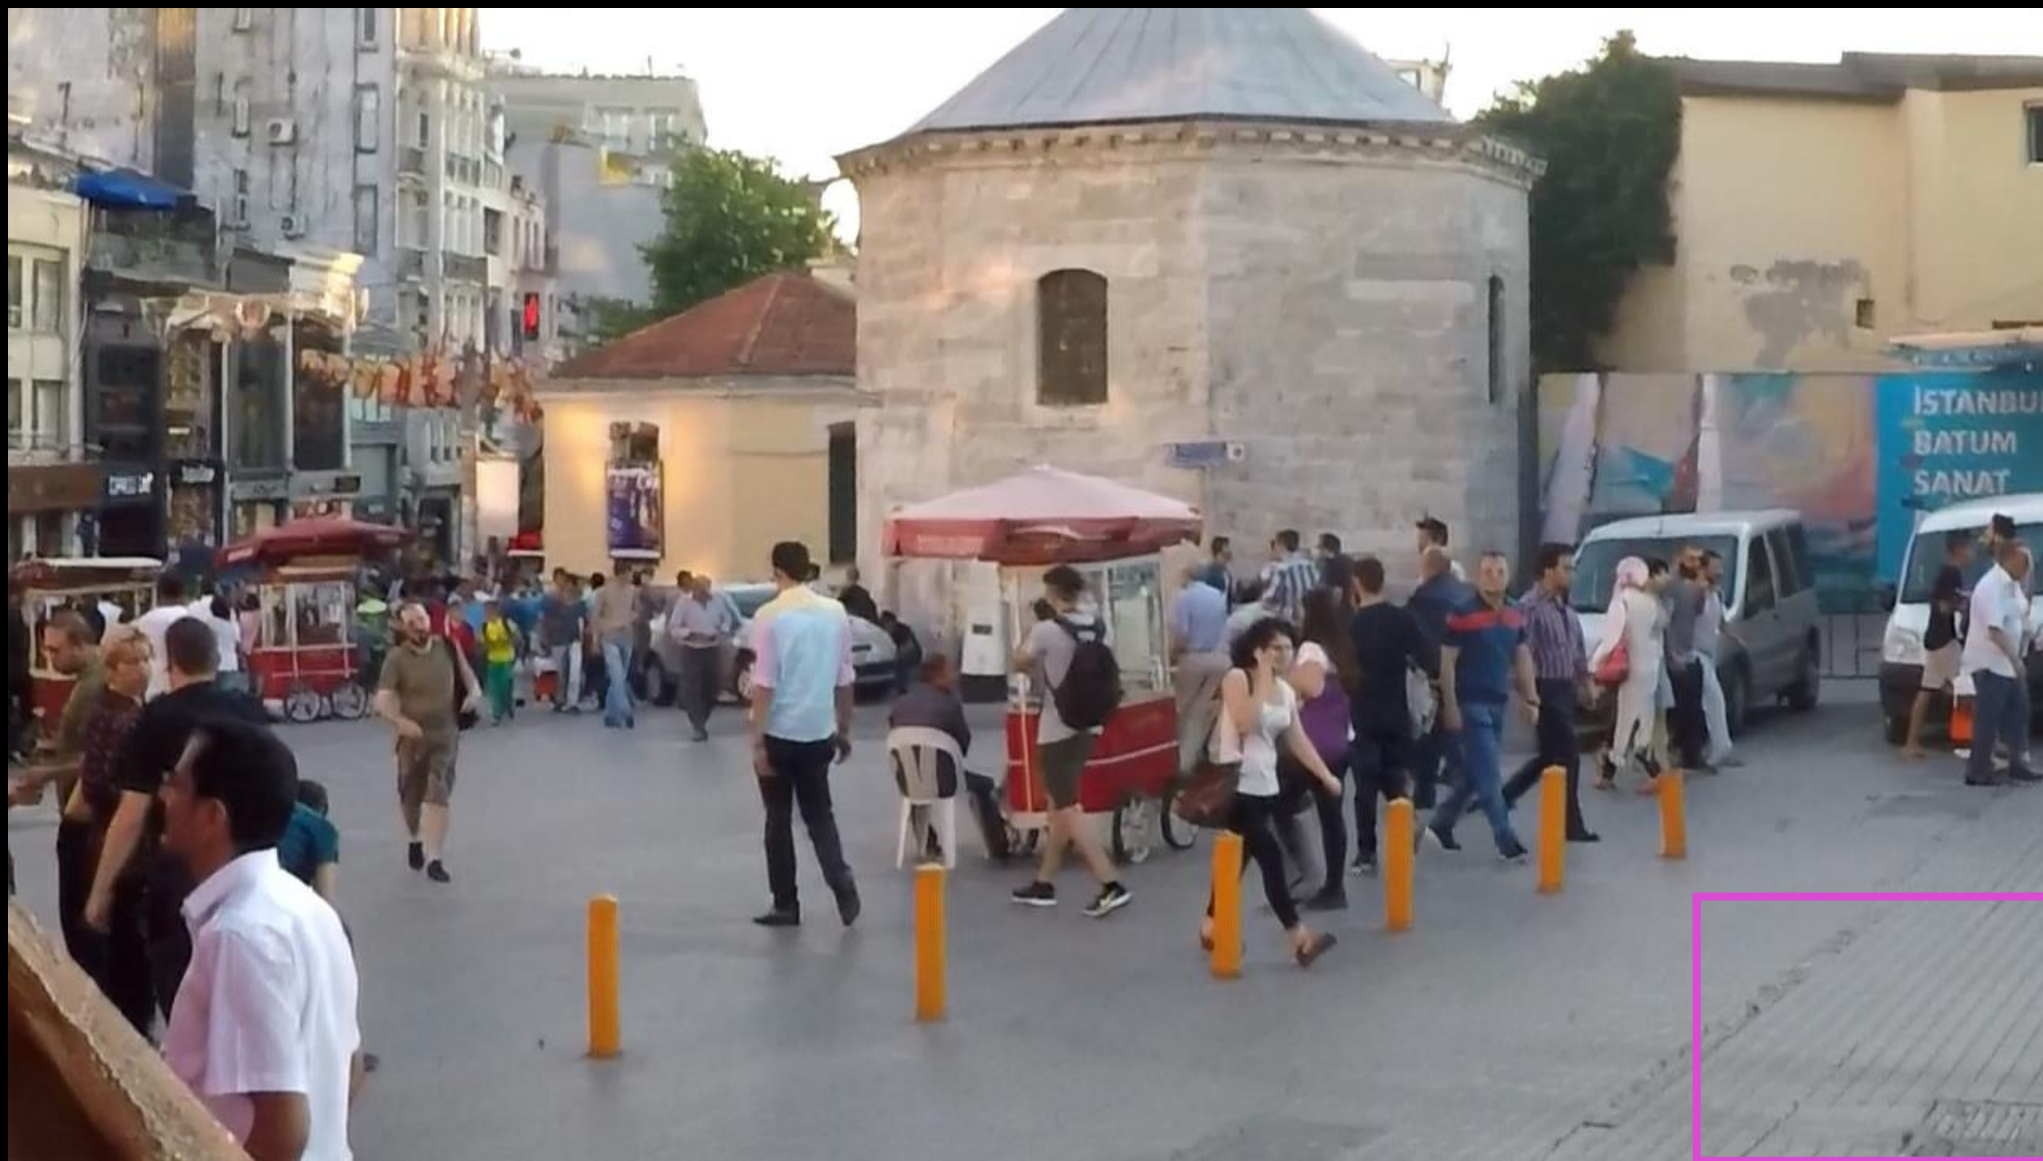

Our Result (MSE + Adversarial)

Test Image 2

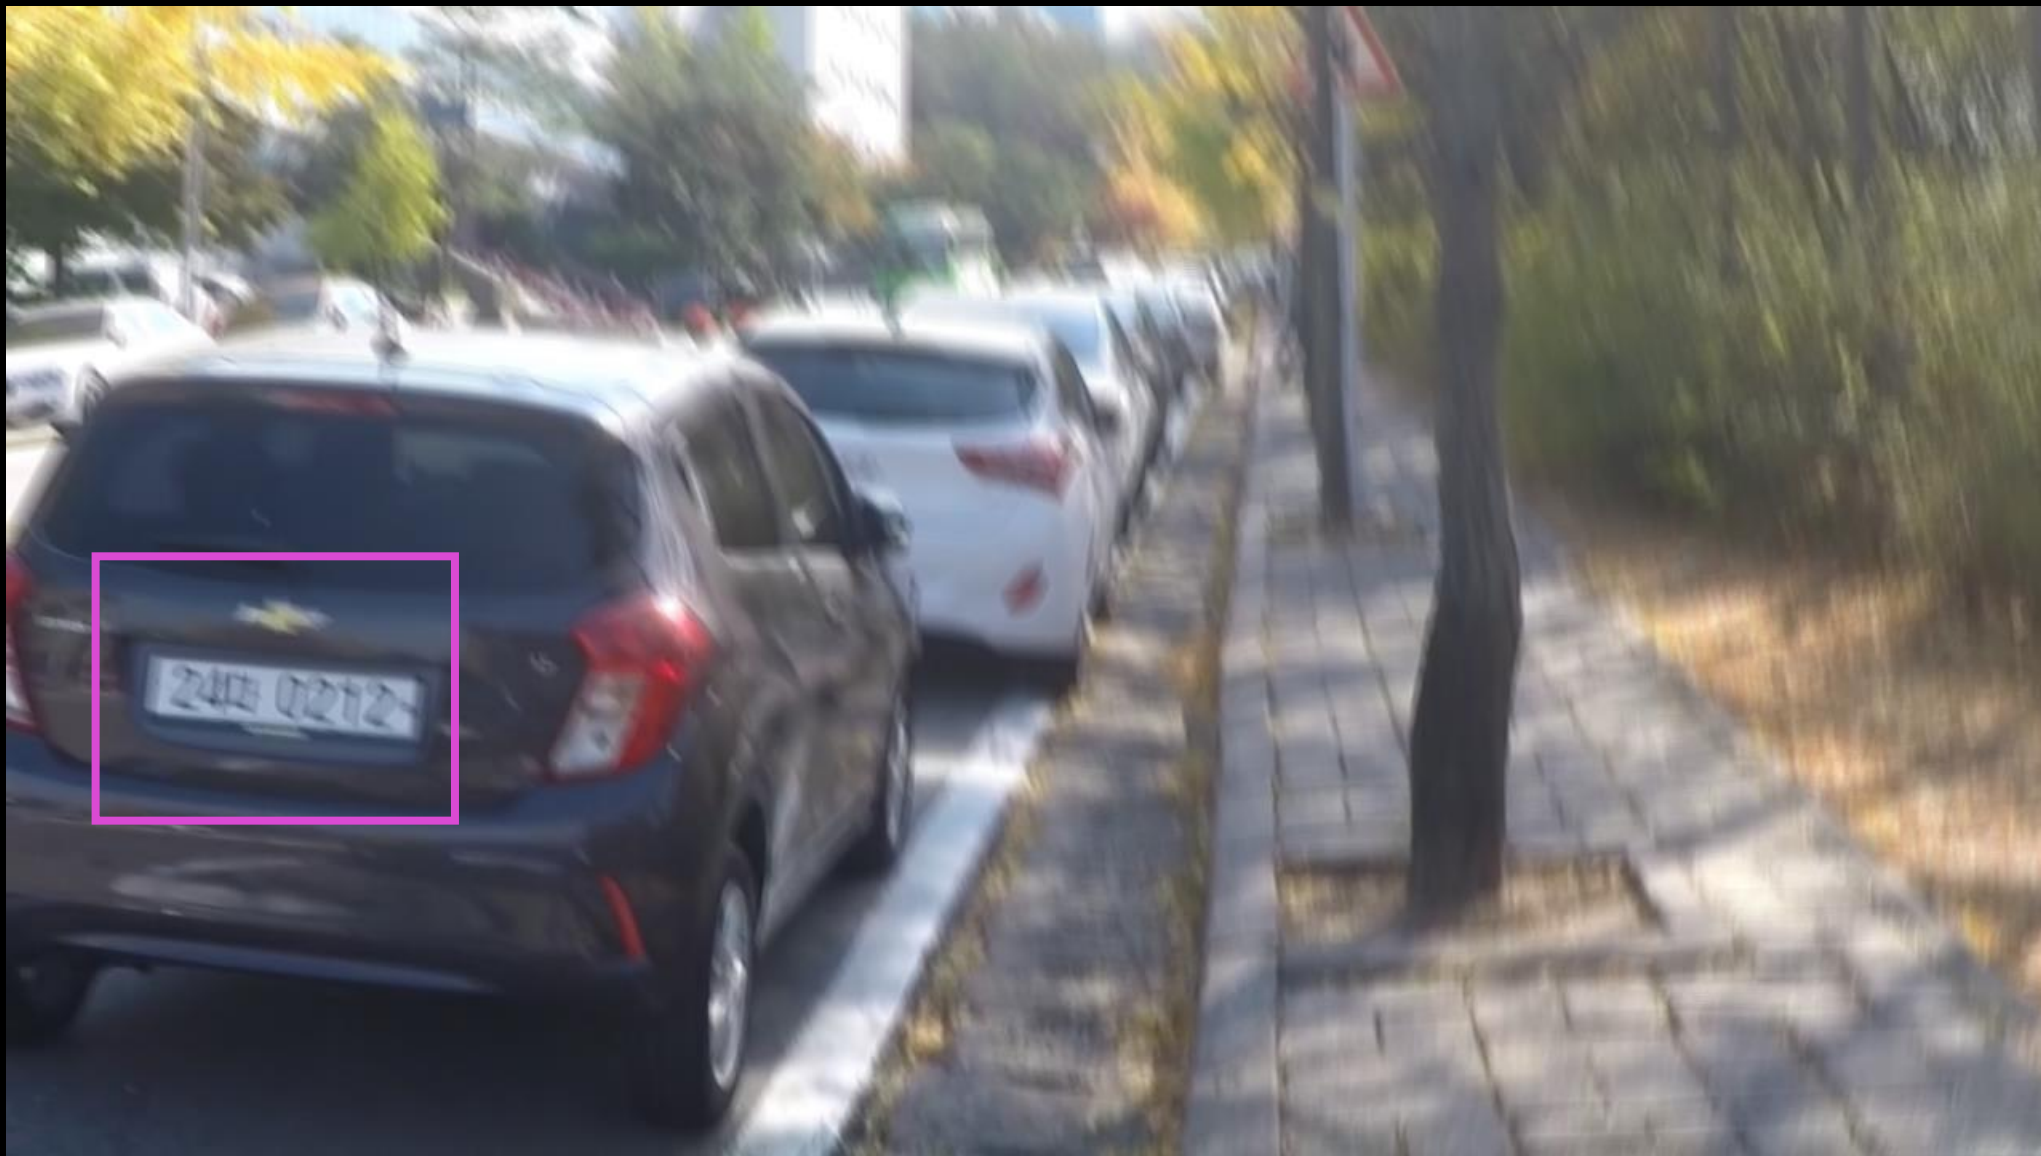

Blurry Input



Test Image 2

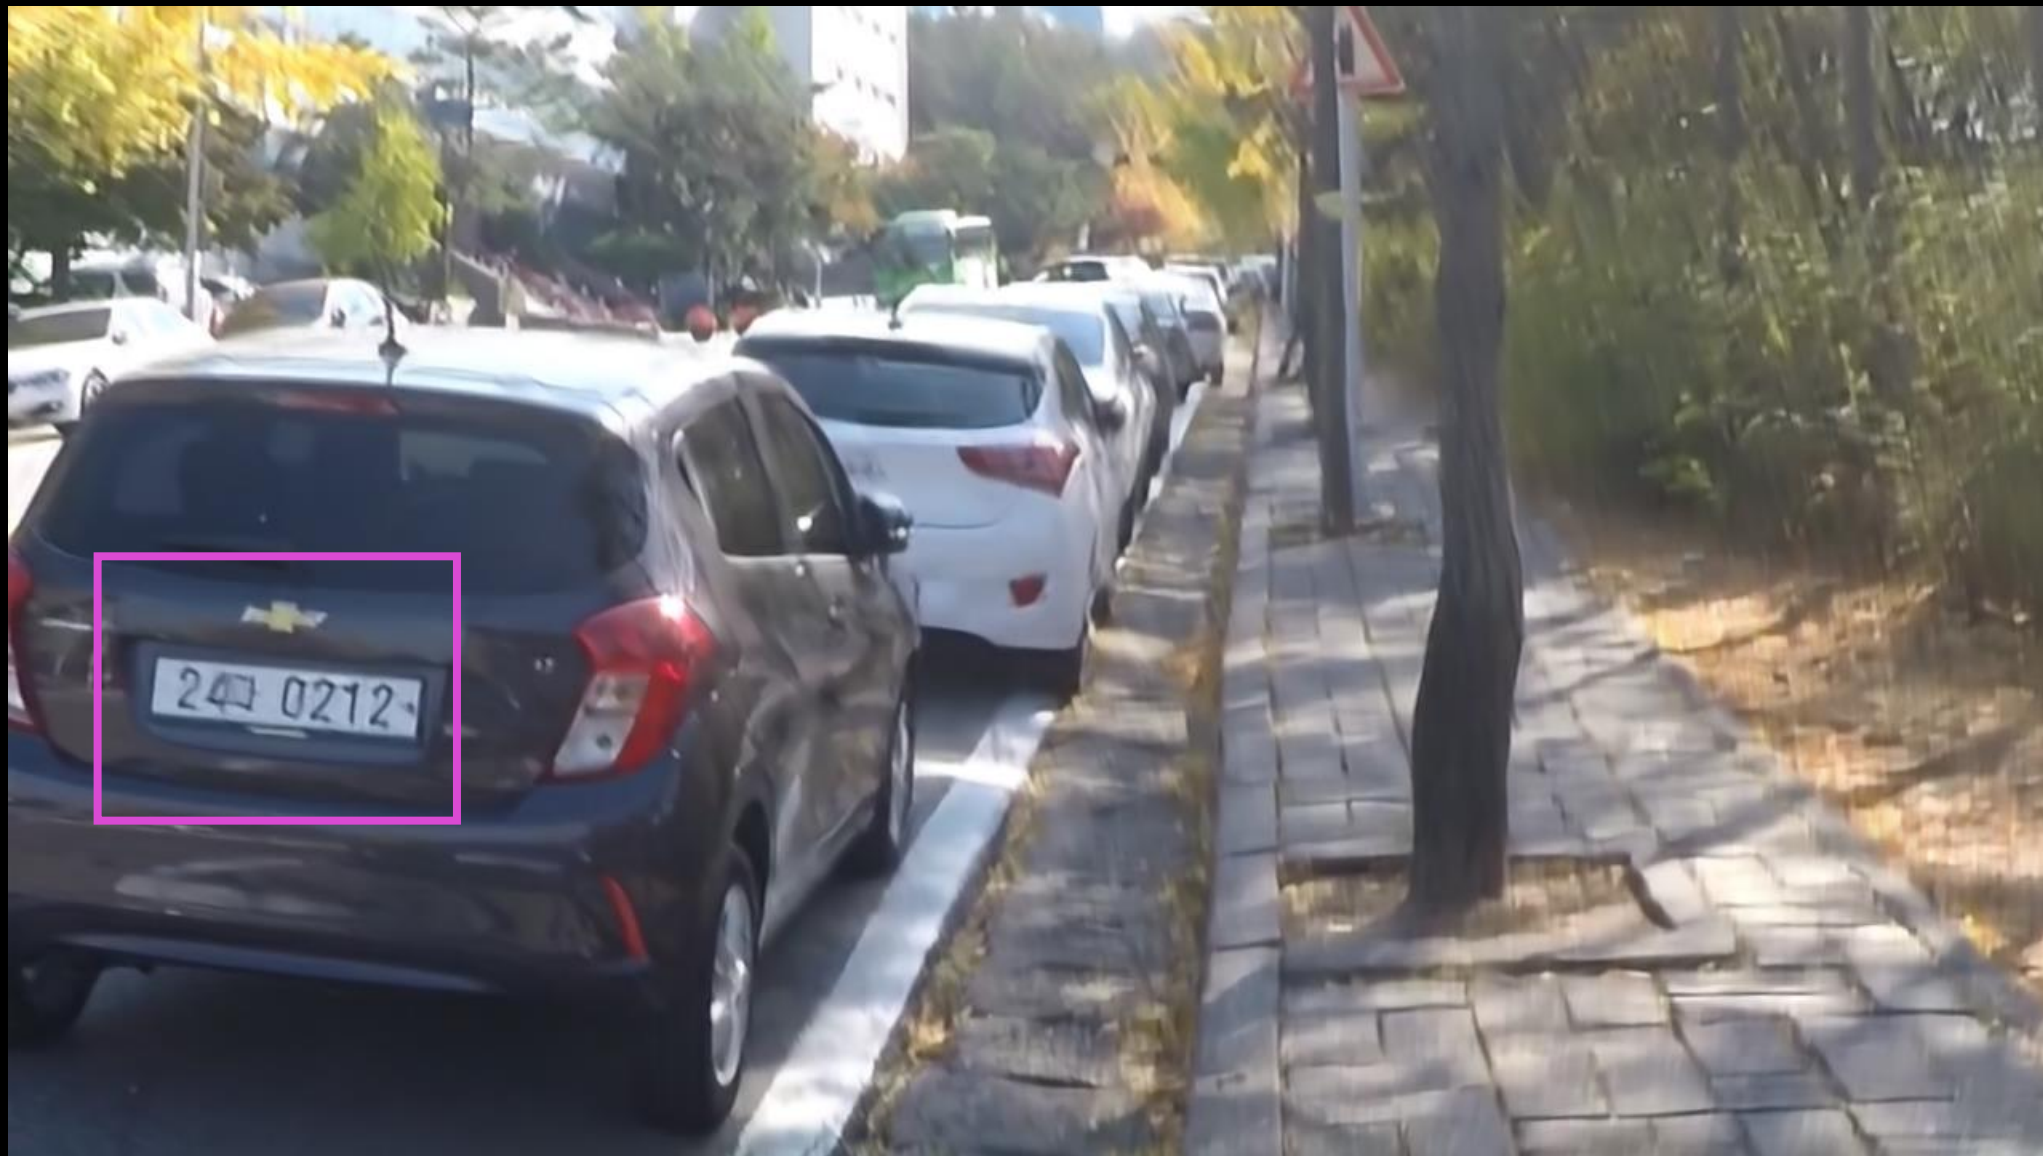

Our Result (MSE)



Test Image 2

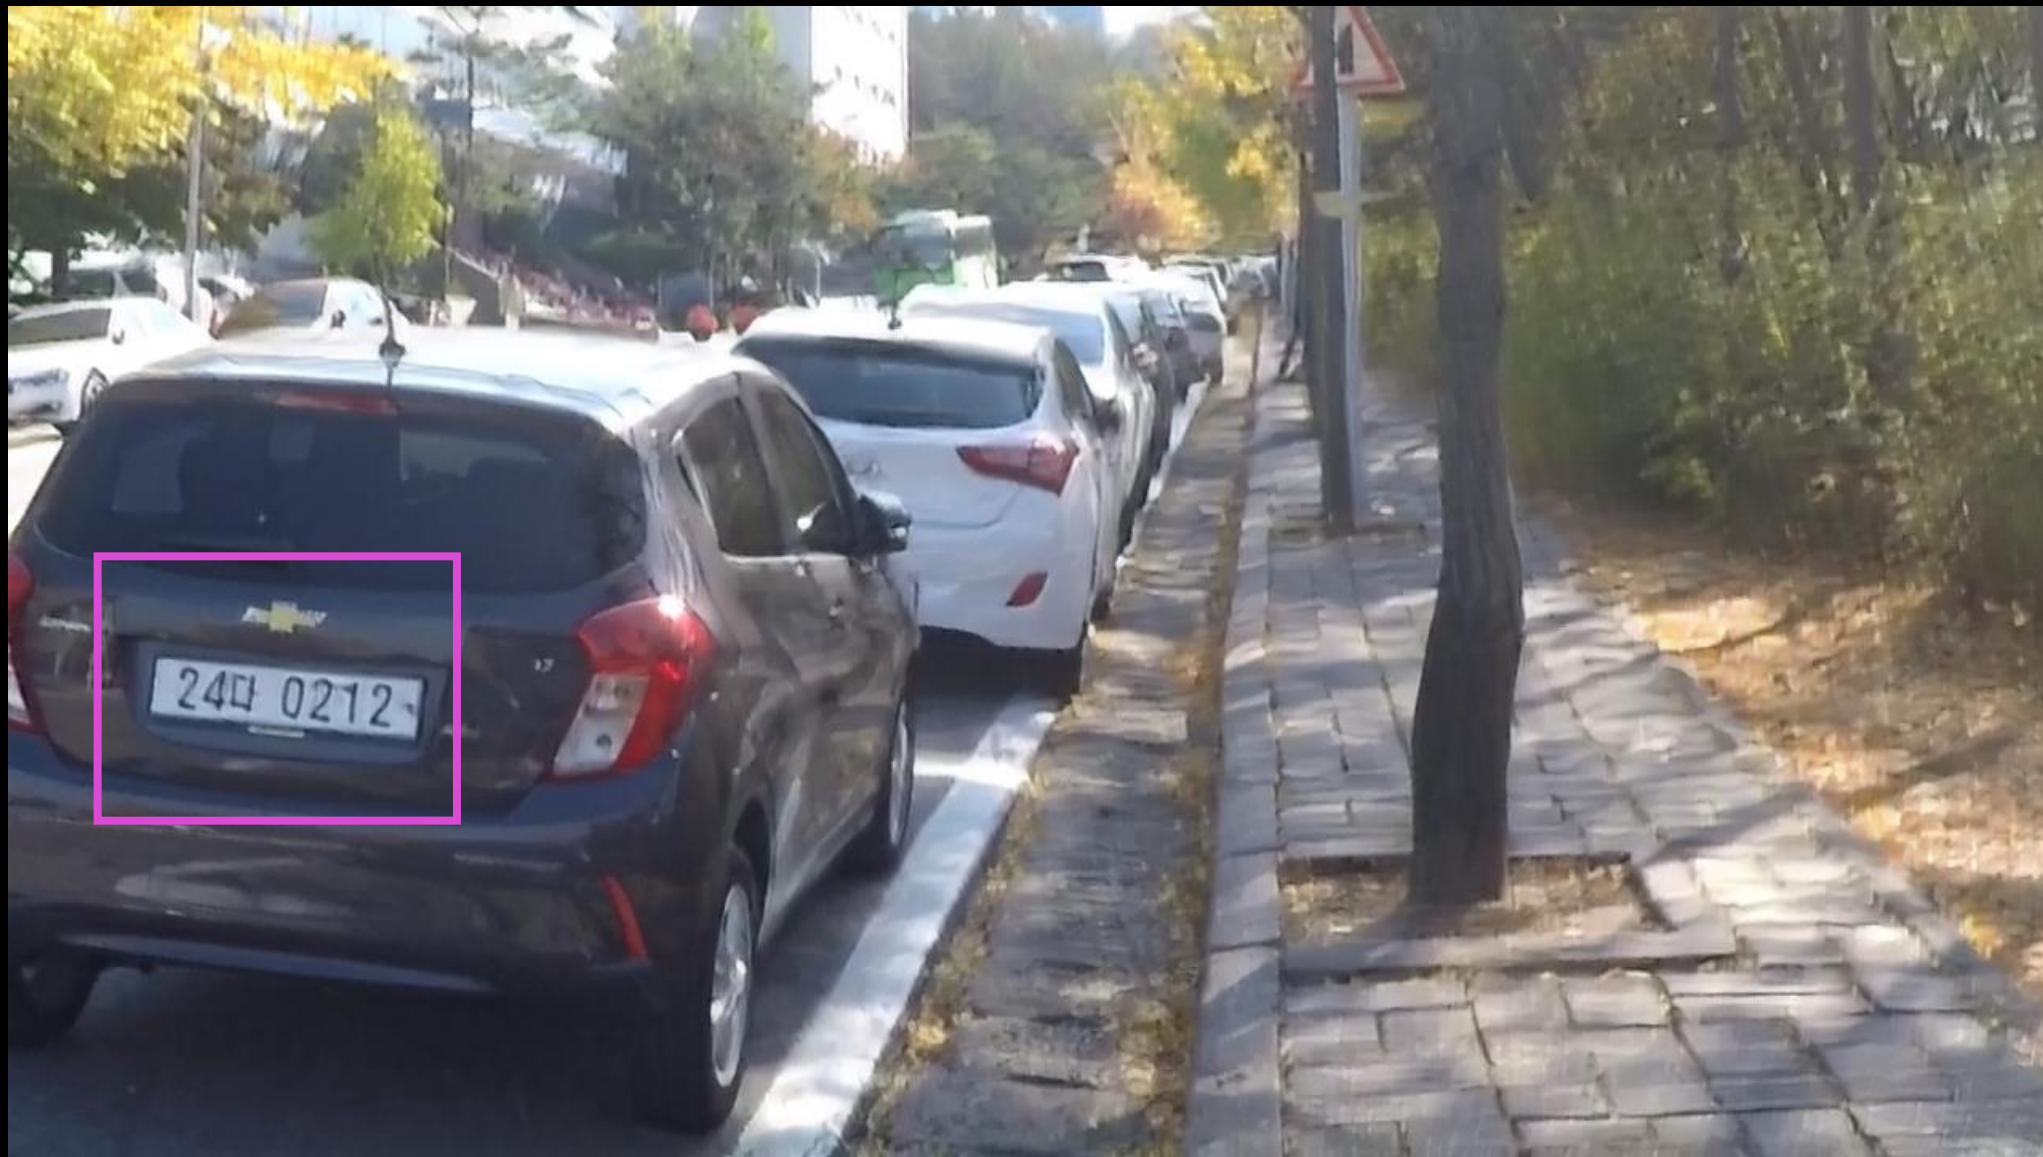

Our Result (MSE + Adversarial)

Test Image 3

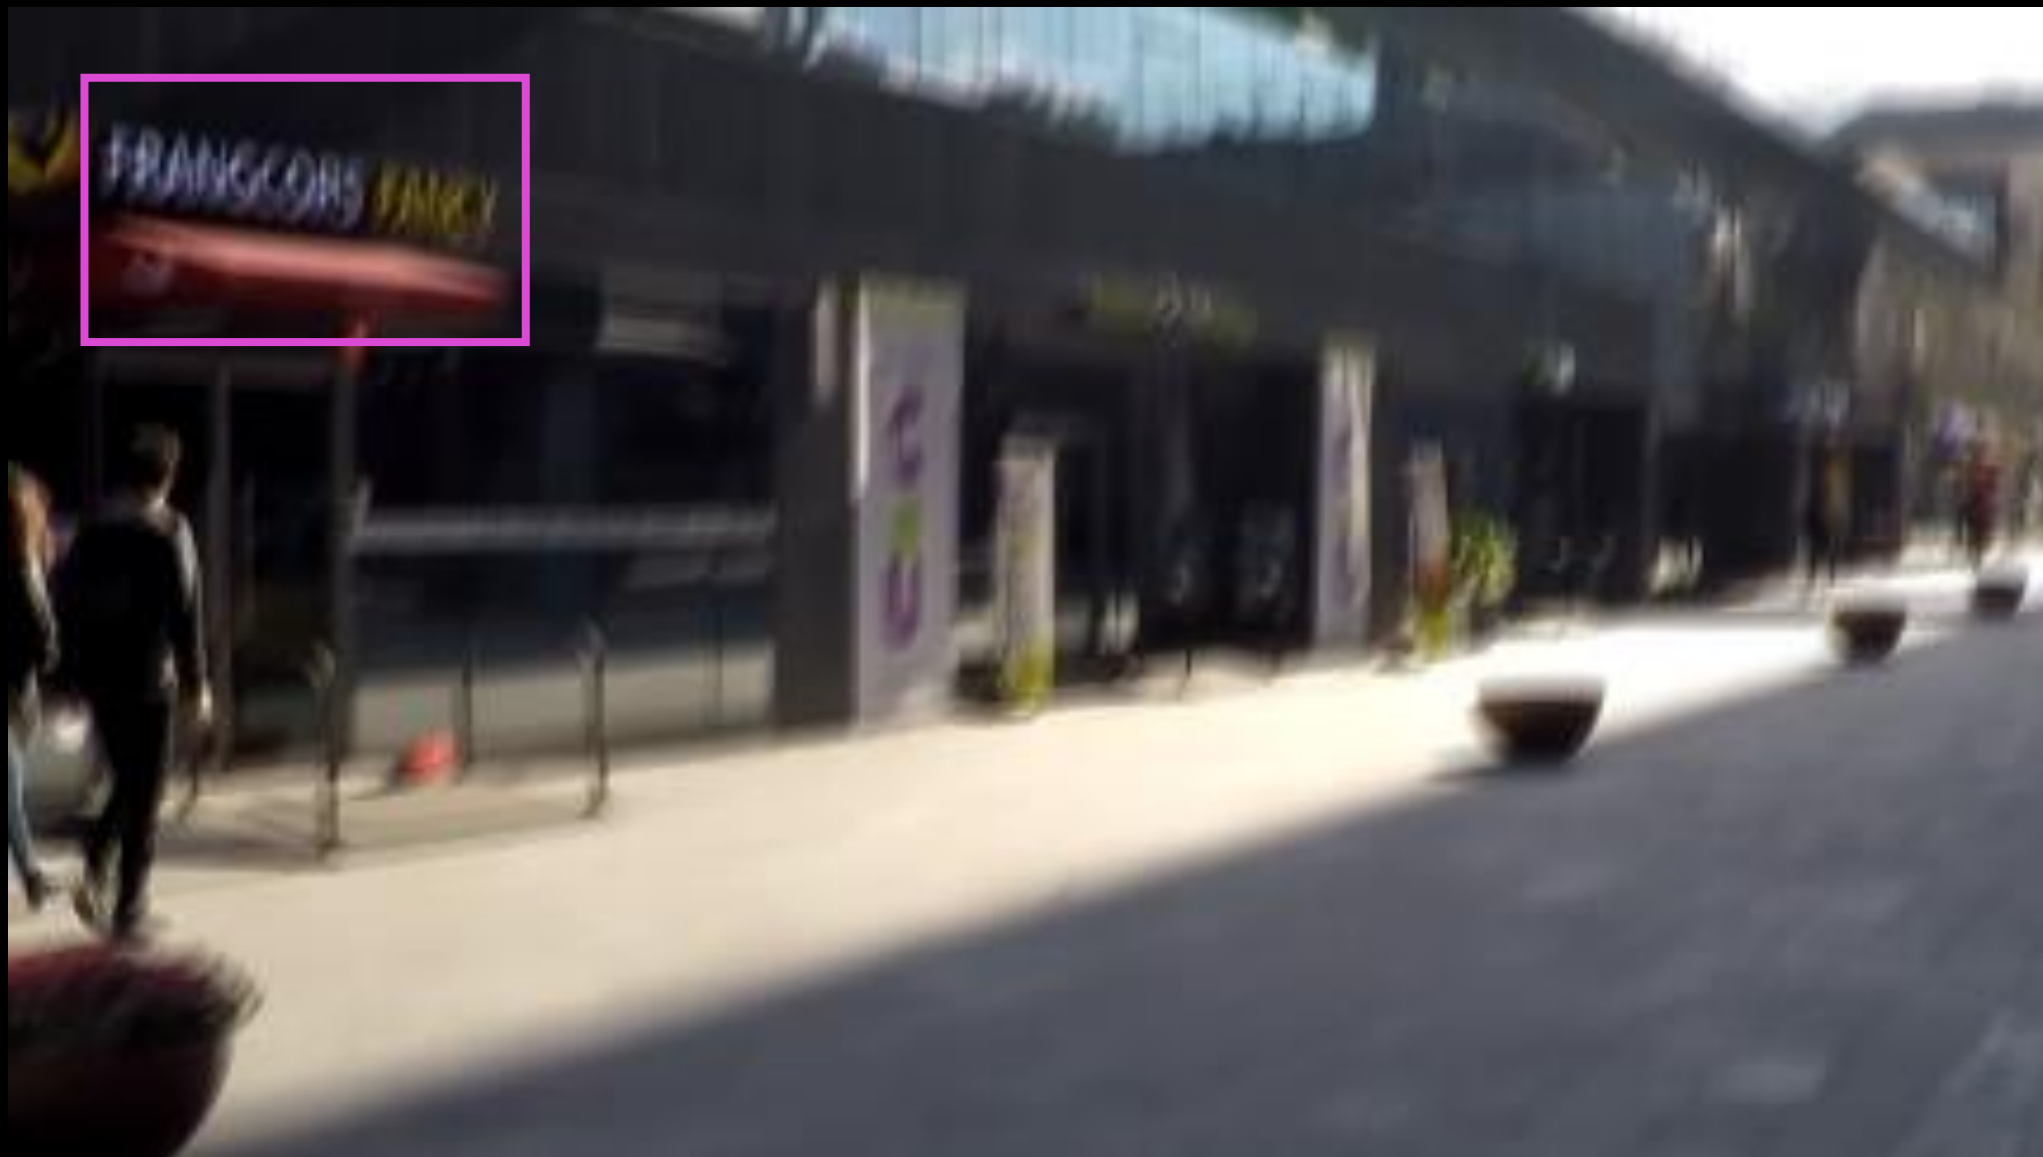

Blurry Input

Test Image 3

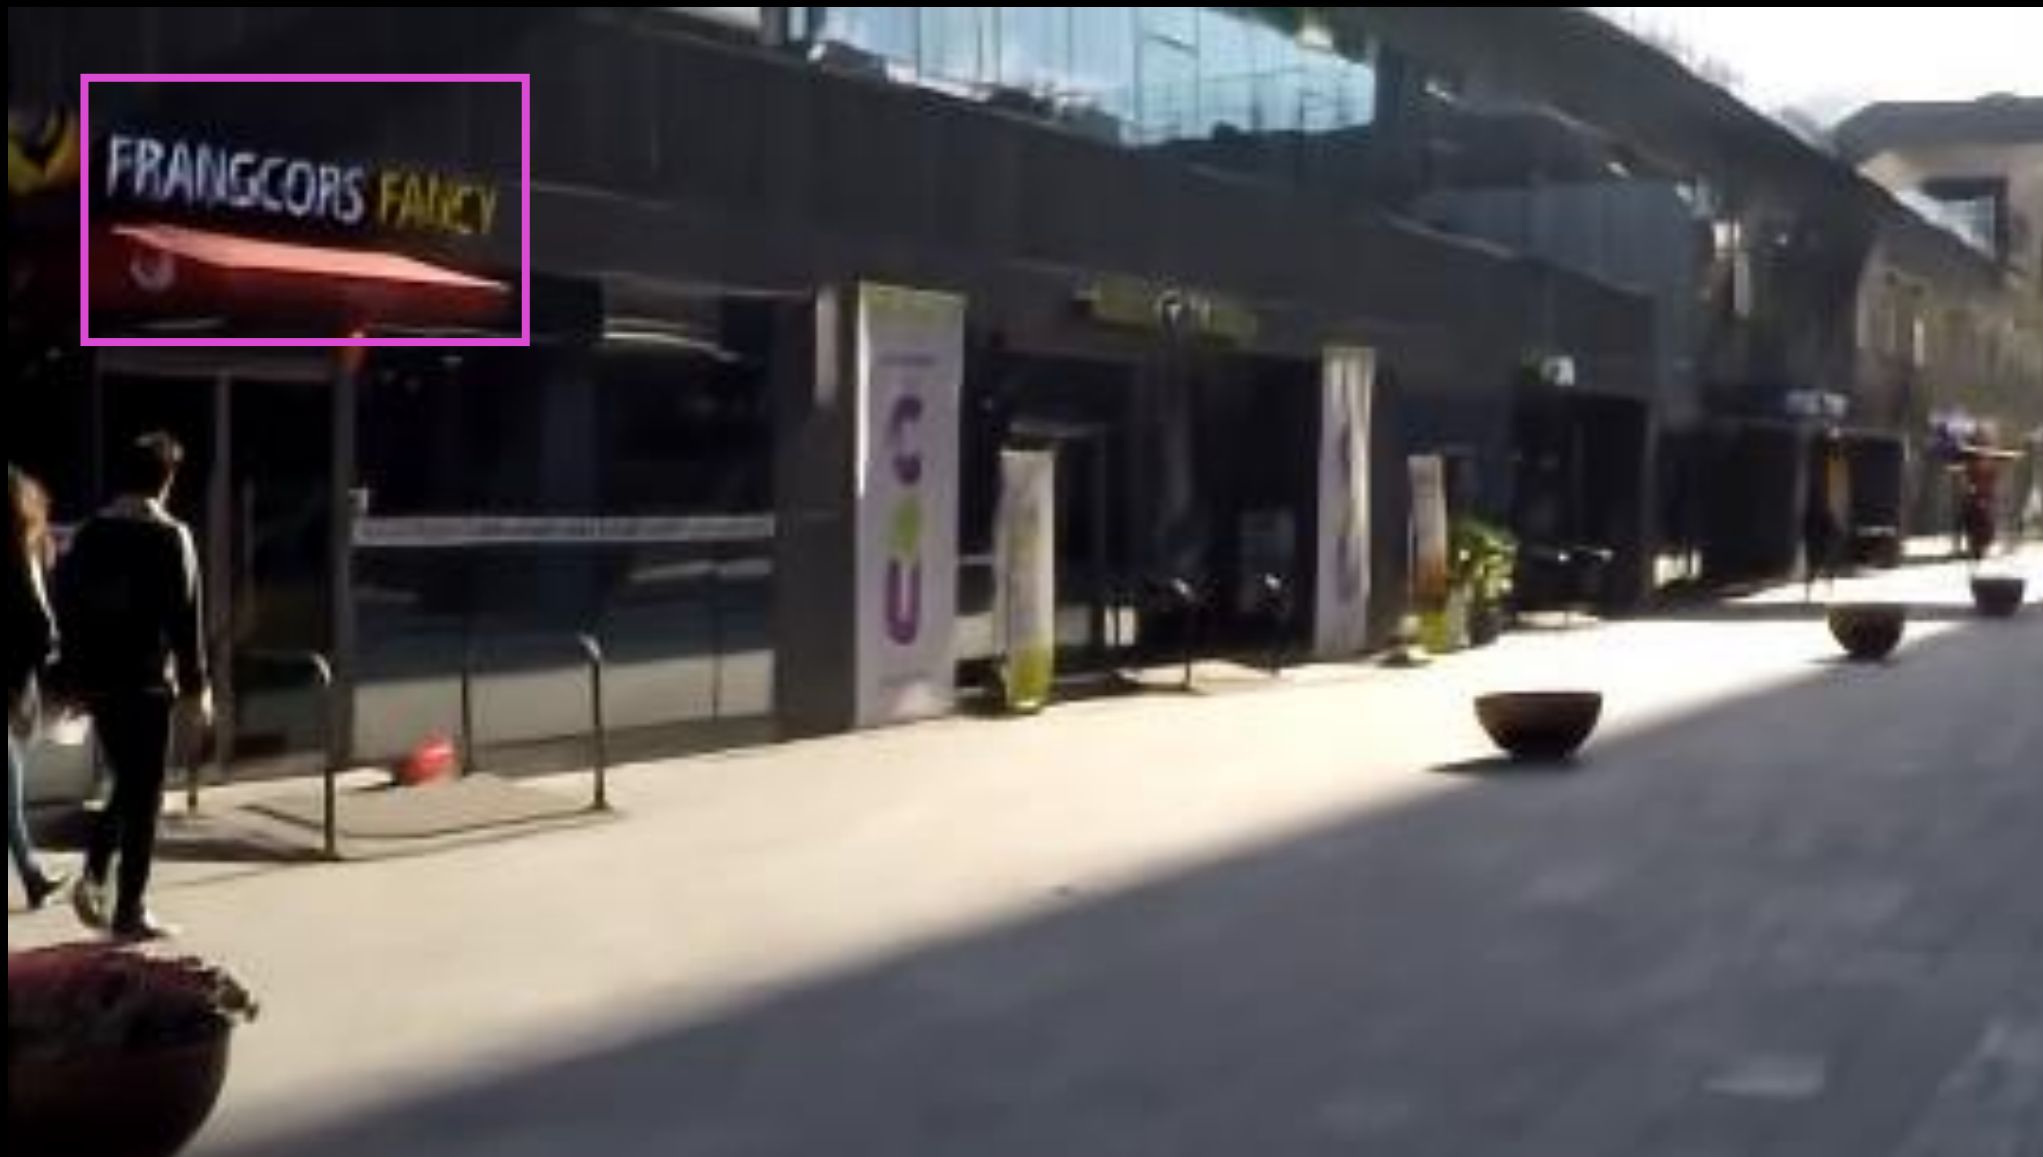

Our Result (MSE)



Test Image 3

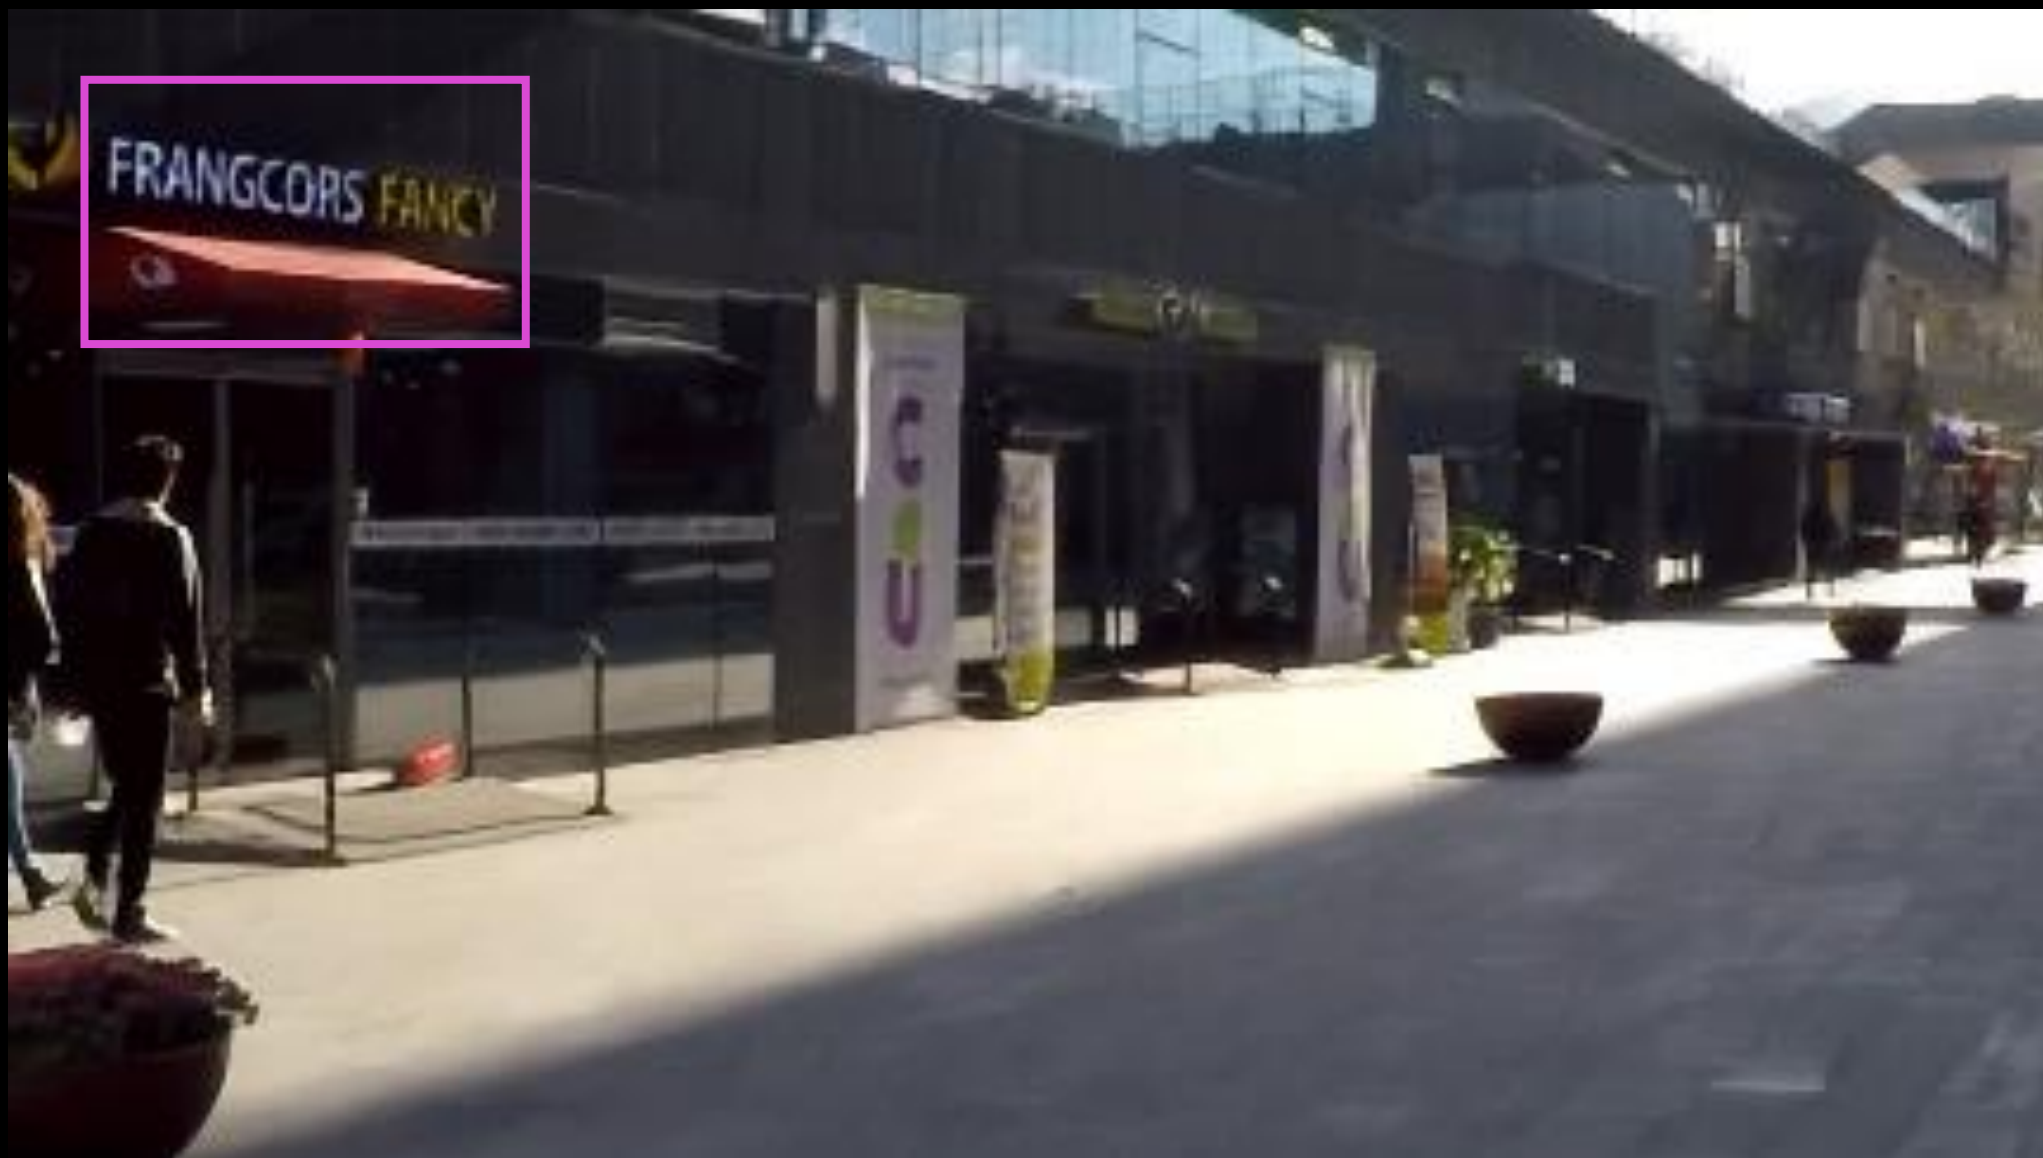

Our Result (MSE + Adversarial)



# Deblurring Result Comparison on Our Test Dataset

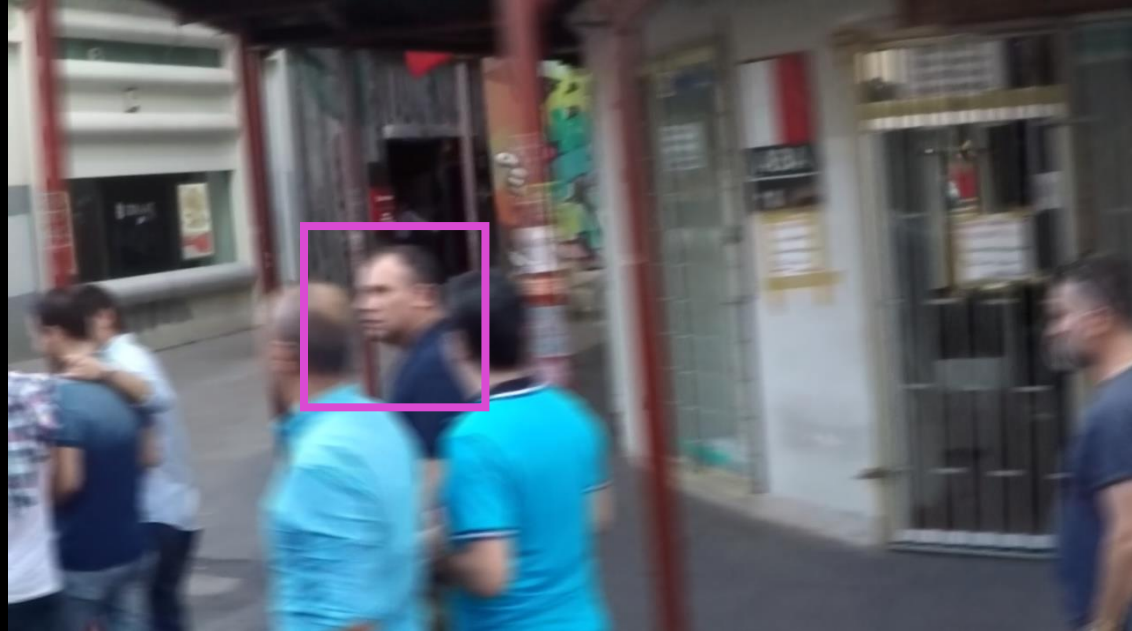

Blurry

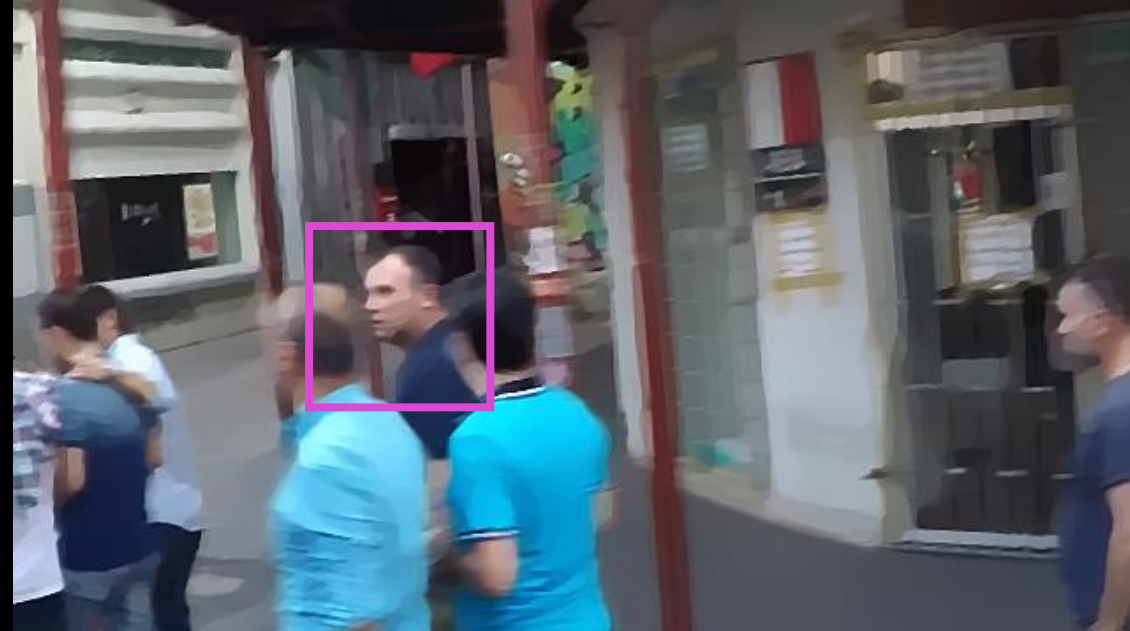

Kim and Lee [15]

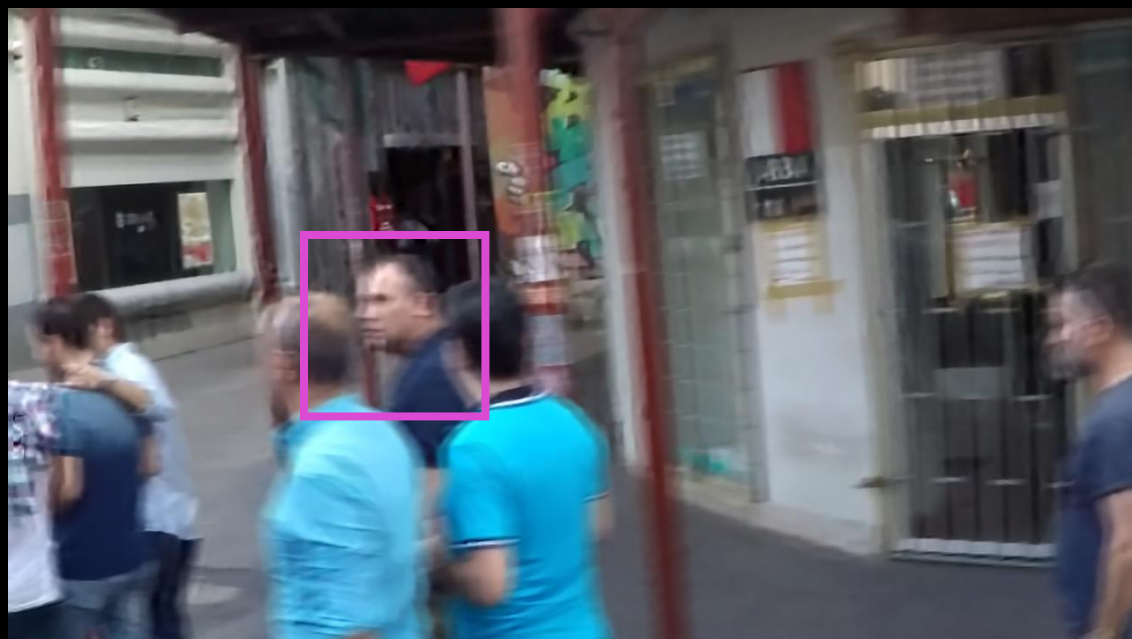

Sun et al. [27]

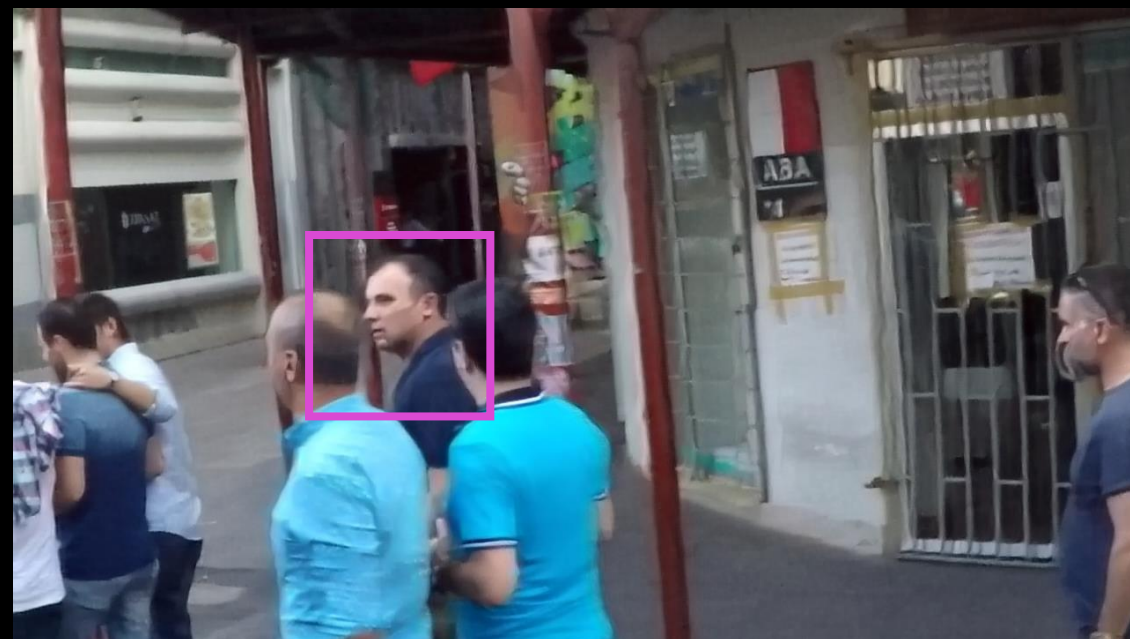

Ours



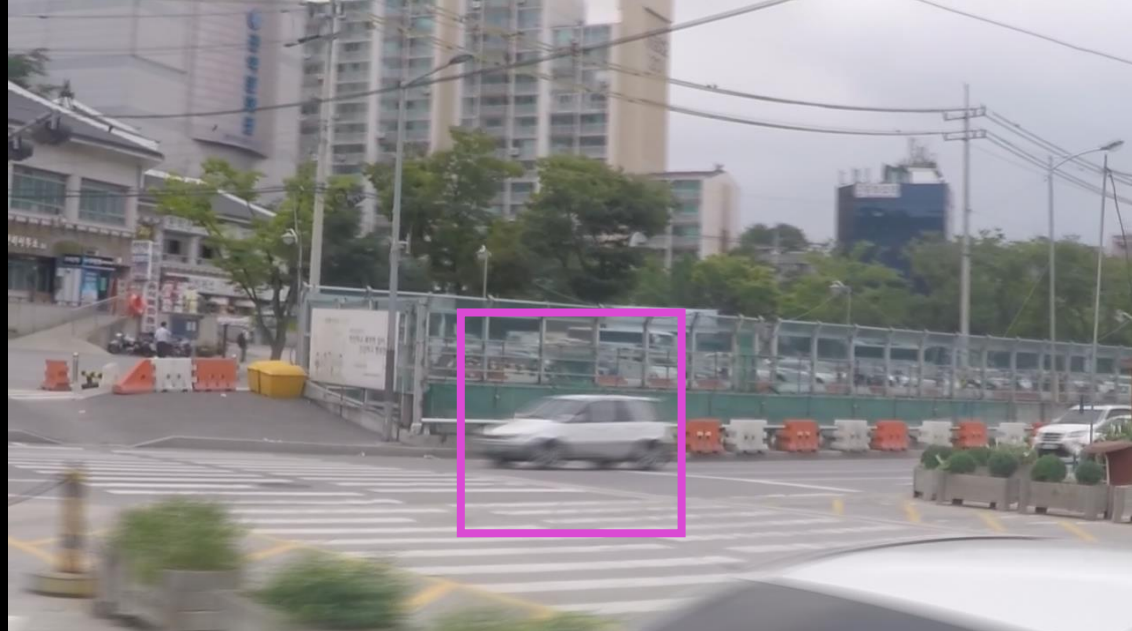

Blurry

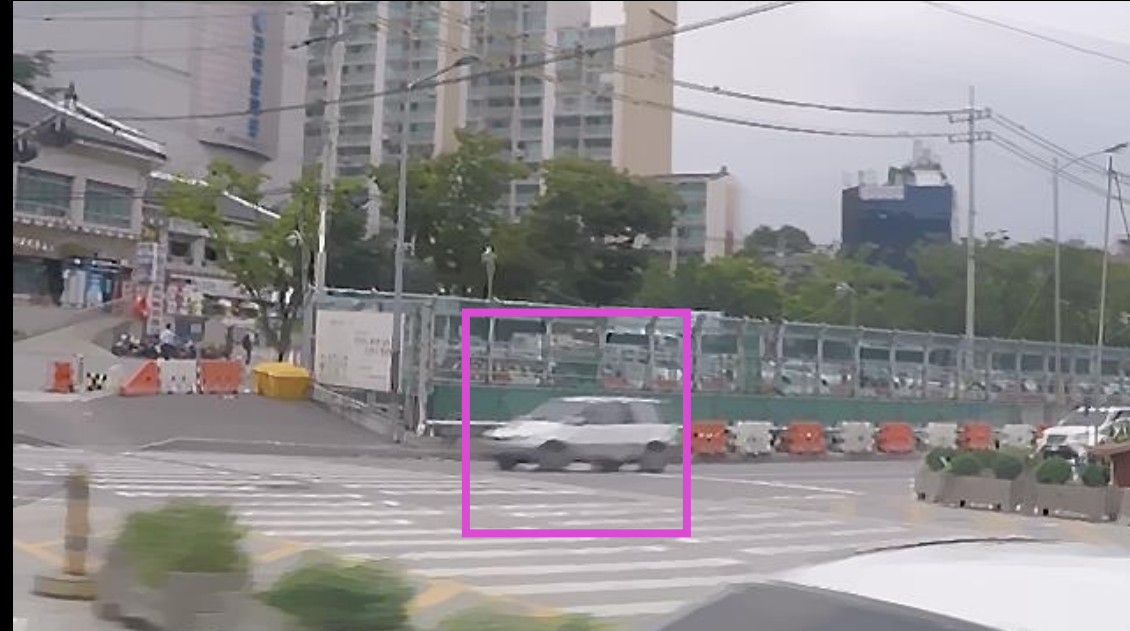

Kim and Lee [15]

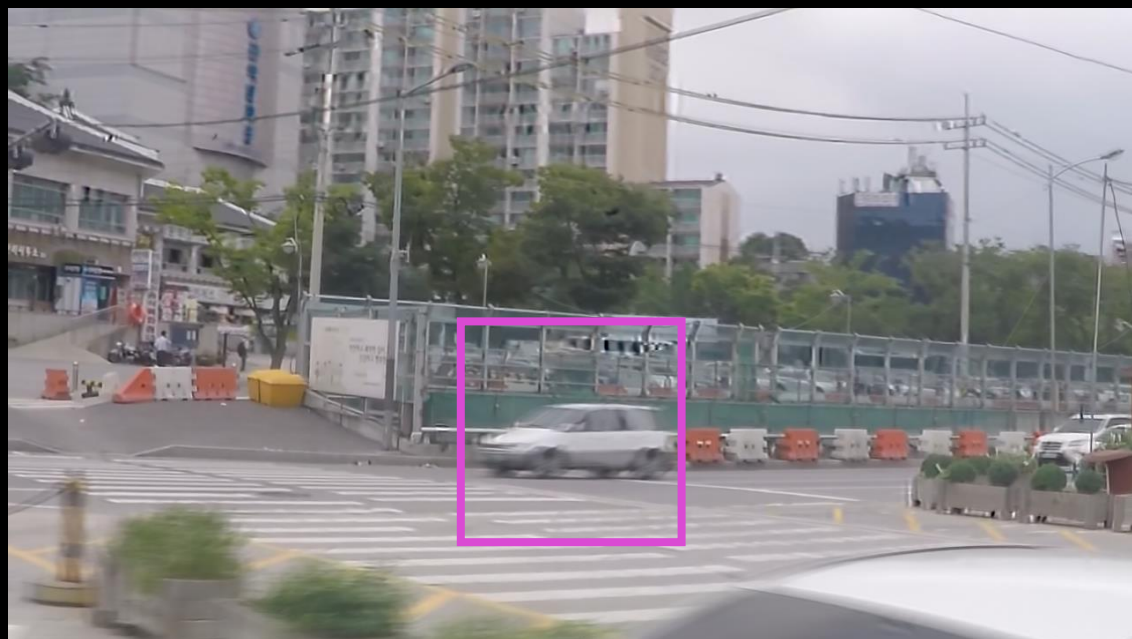

Sun et al. [27]

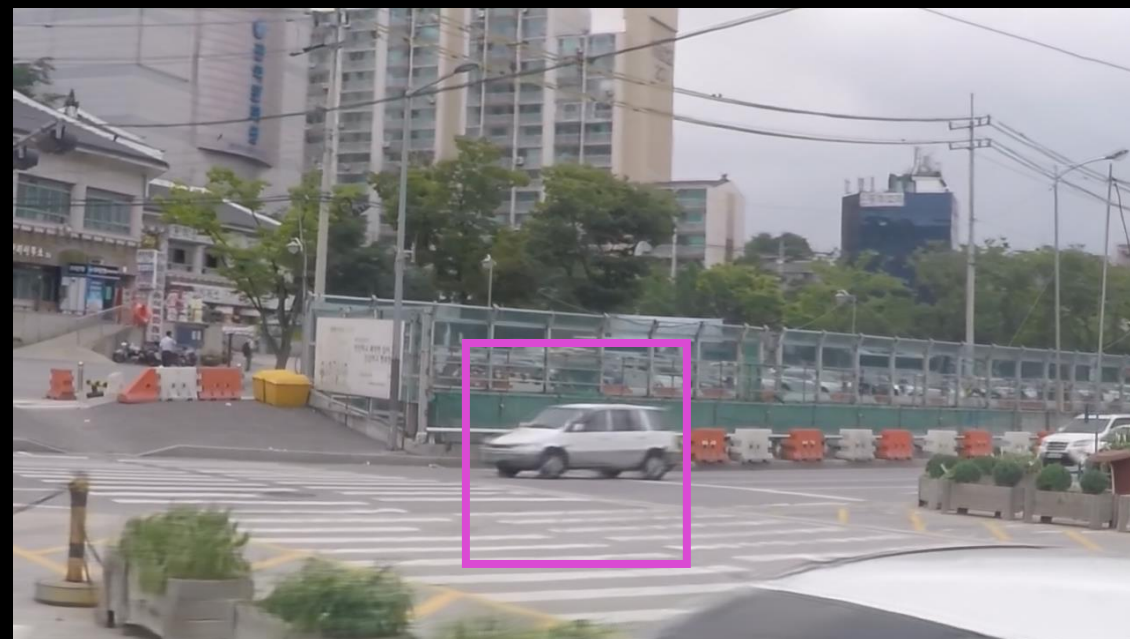

Ours



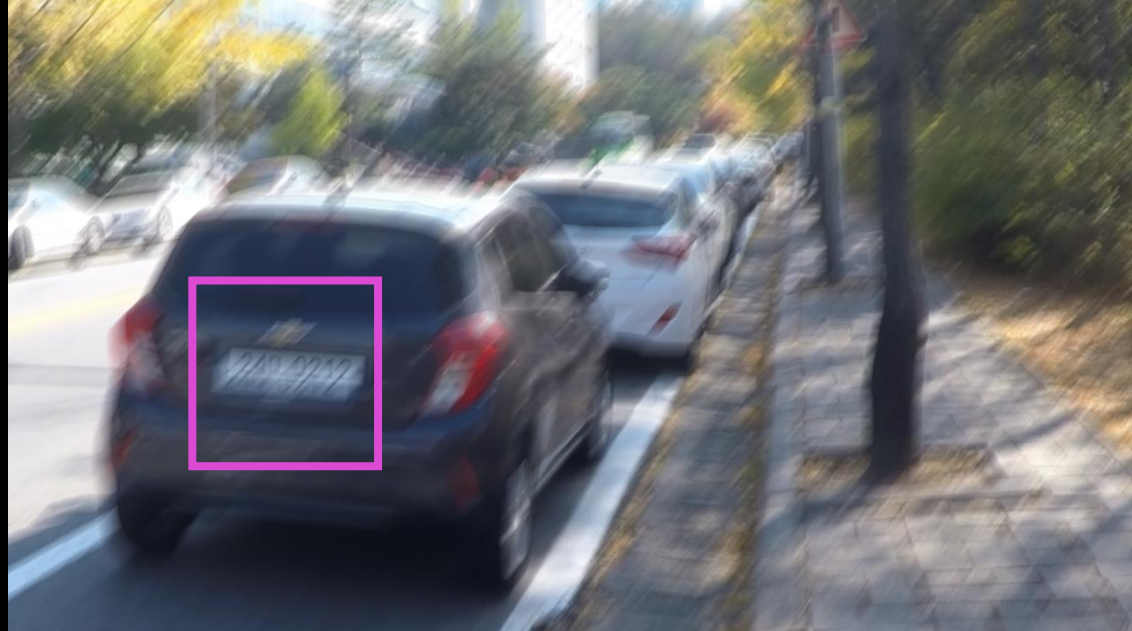

Blurry

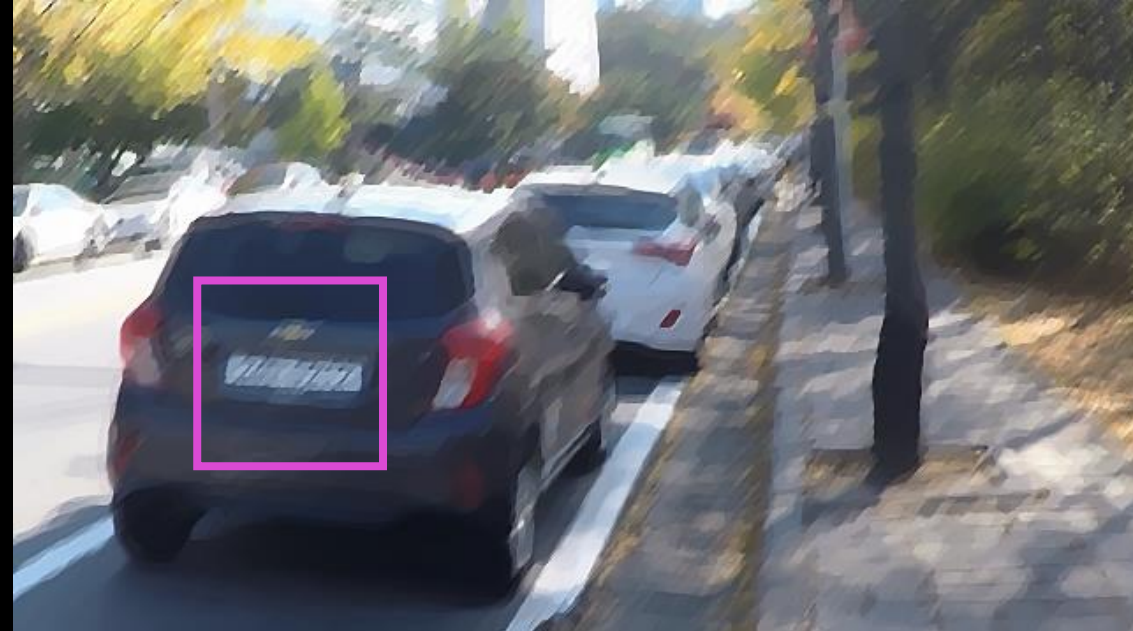

Kim and Lee [15]

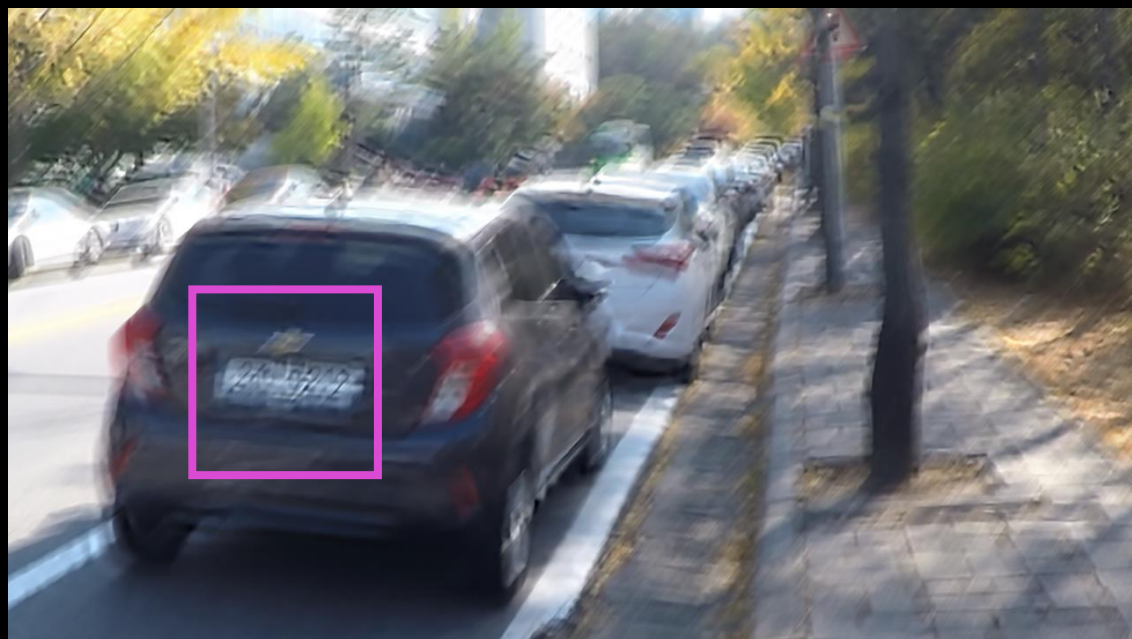

Sun et al. [27]

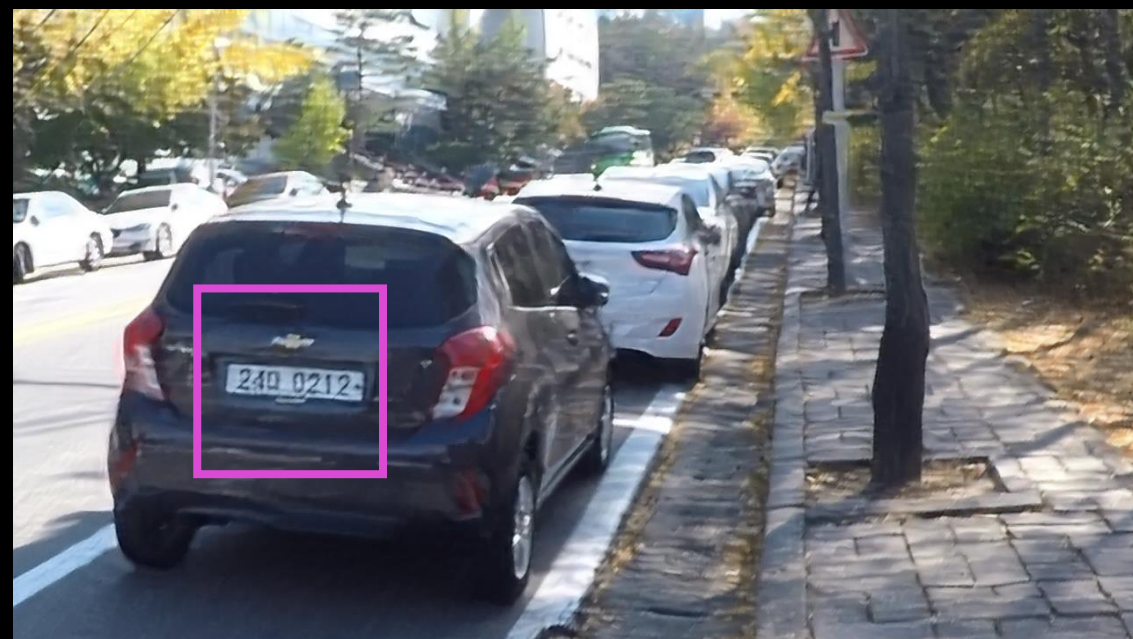

Ours



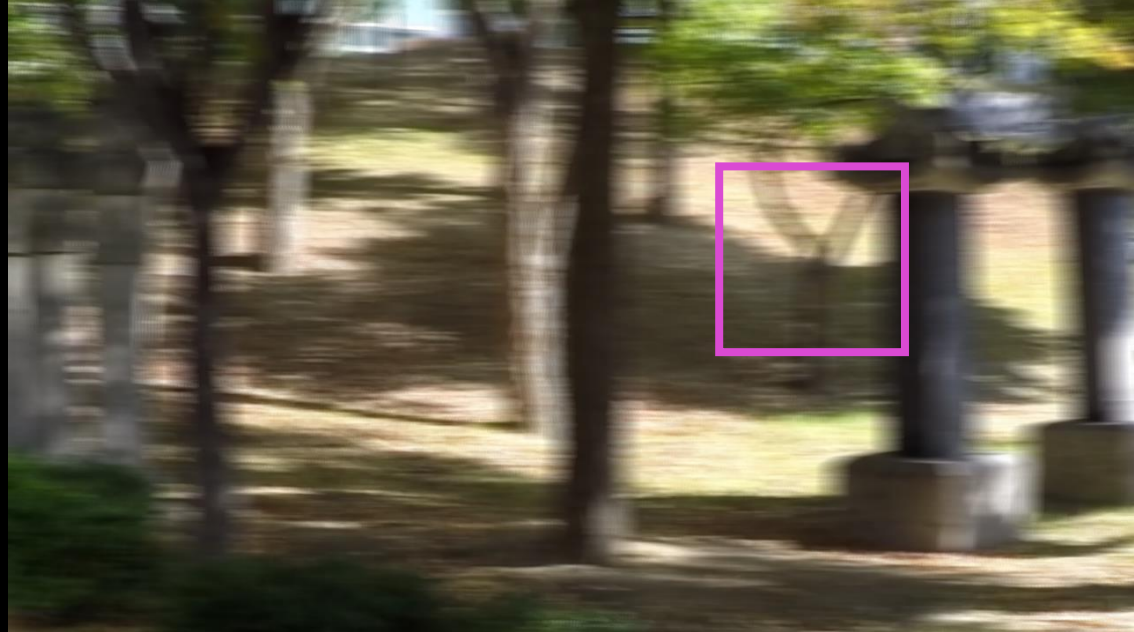

Blurry

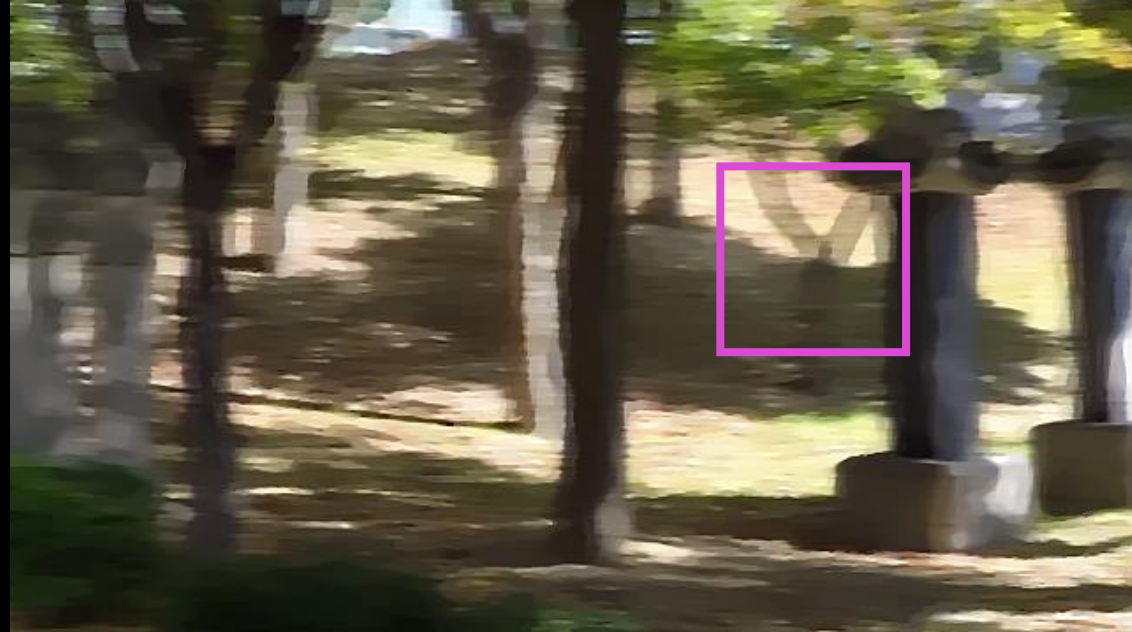

Kim and Lee [15]

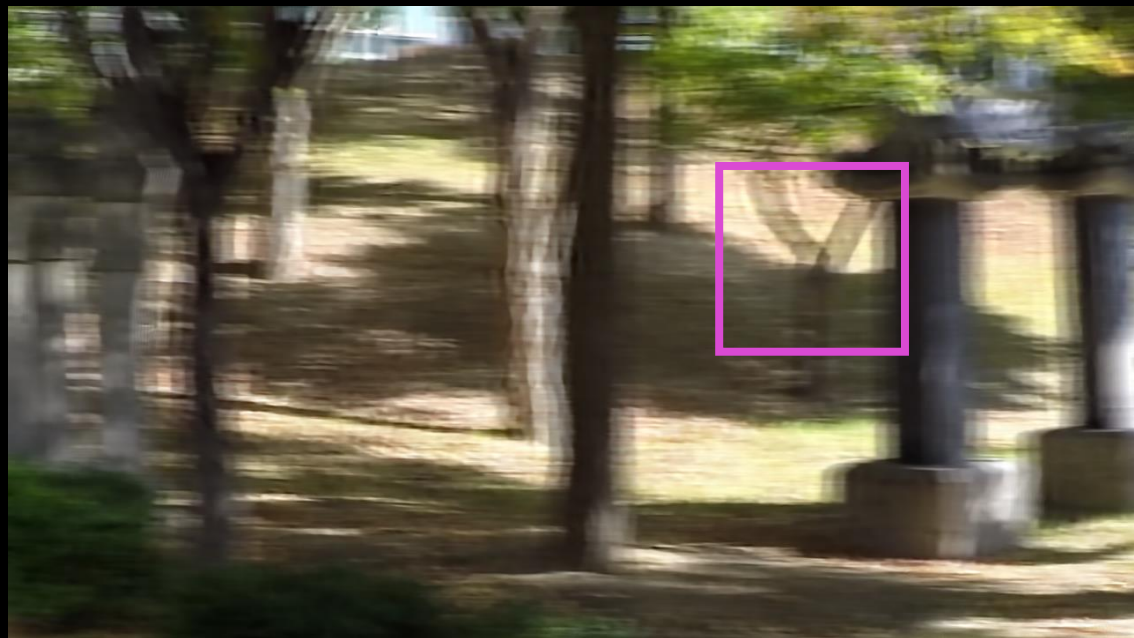

Sun et al. [27]

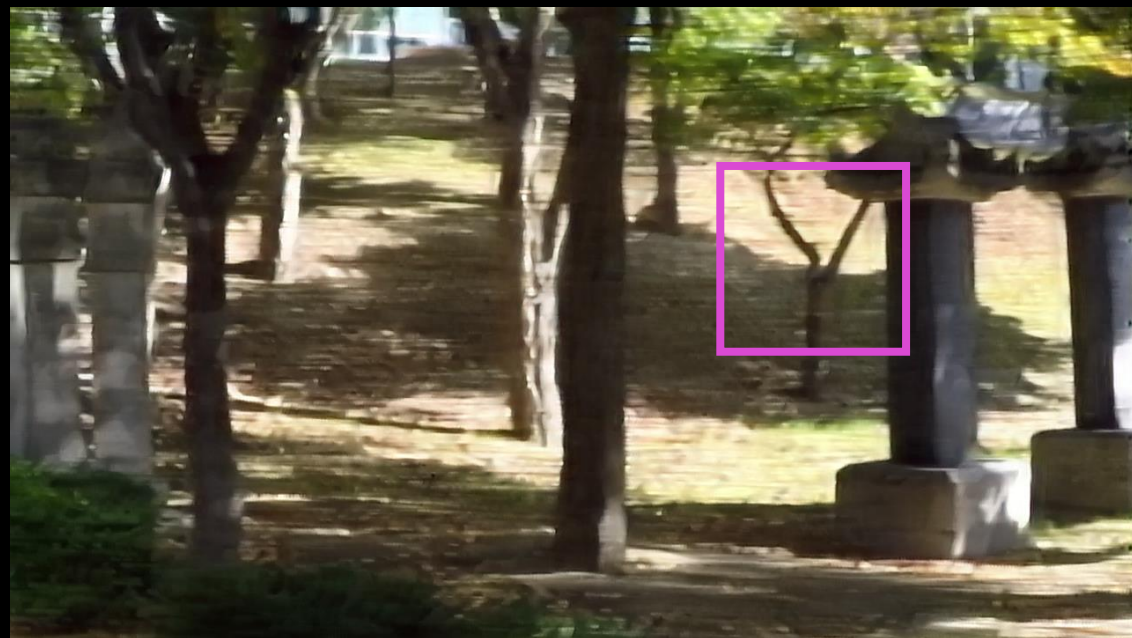

Ours

# Deblurring Result Comparison on Lai et al.[20] Dataset



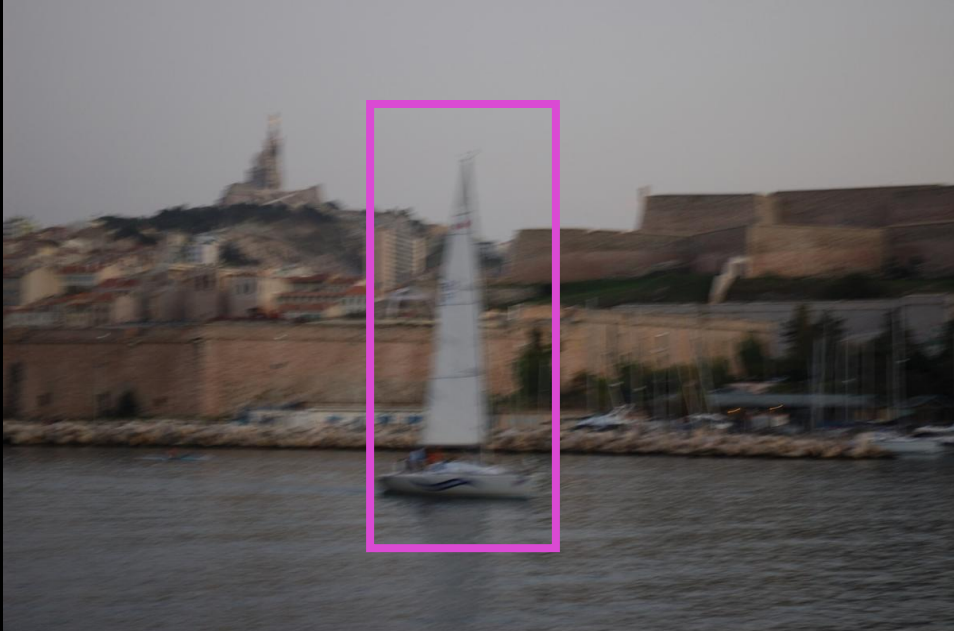

Blurry

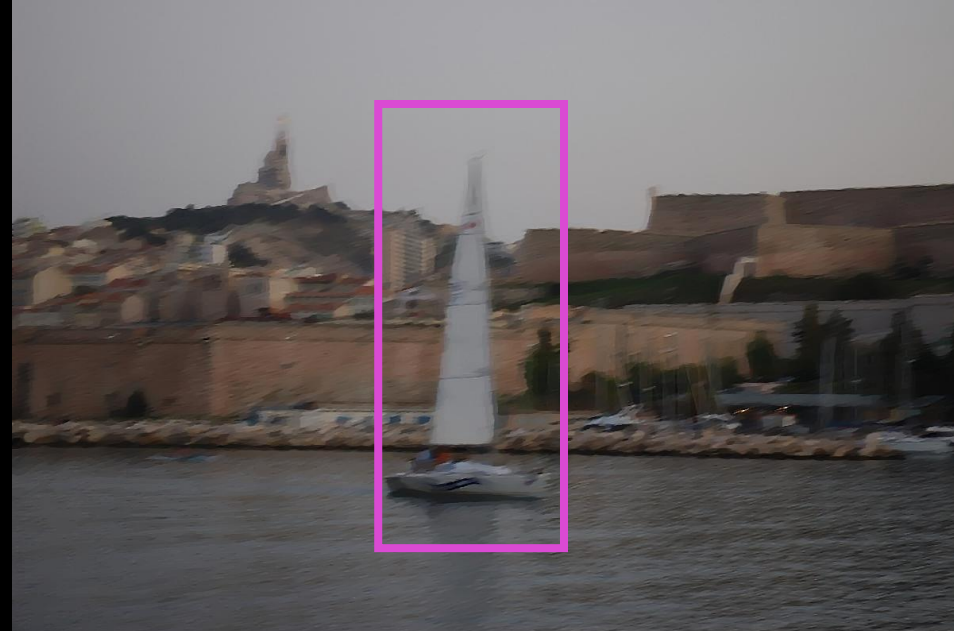

Kim and Lee [15]

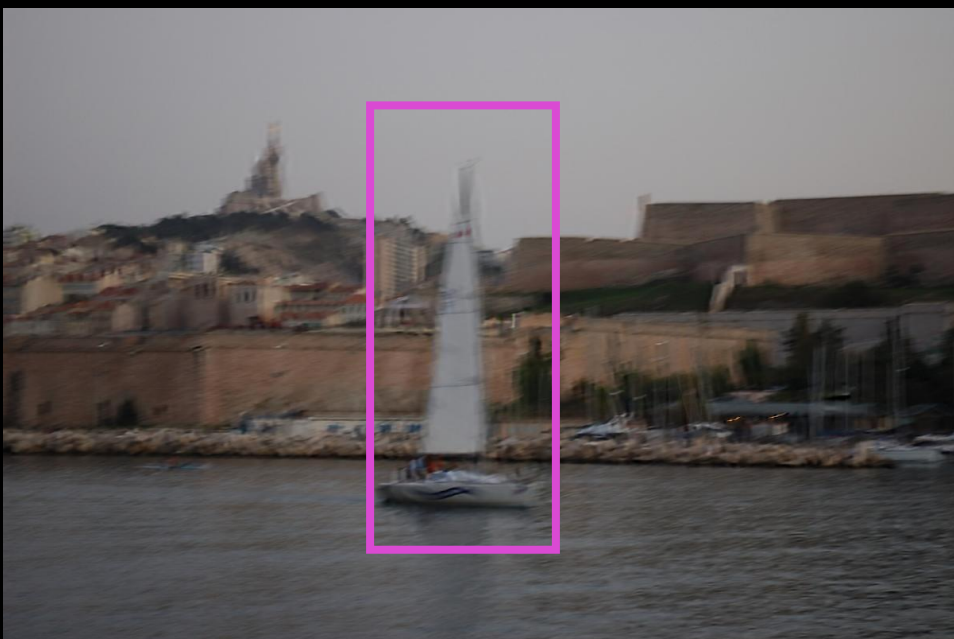

Sun et al. [27]

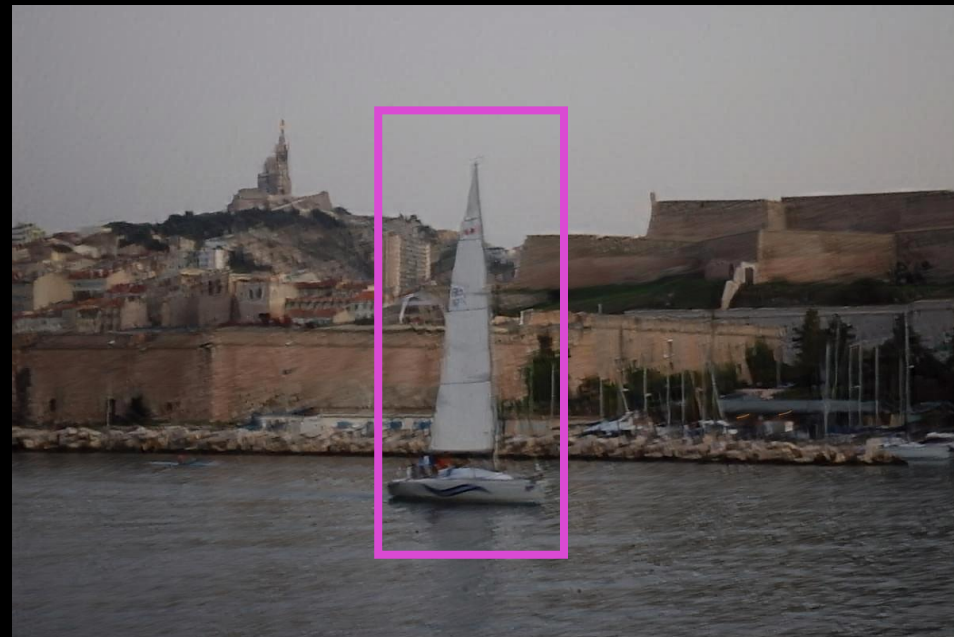

Ours

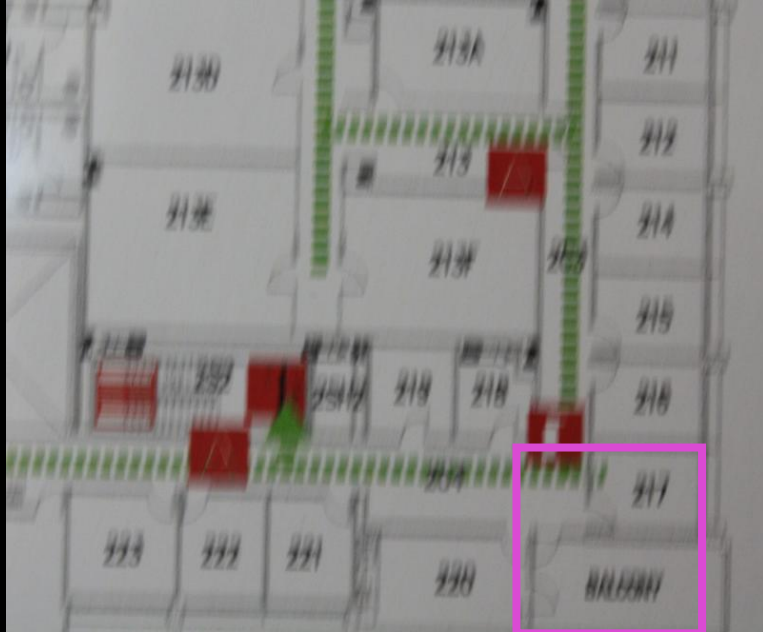

Blurry

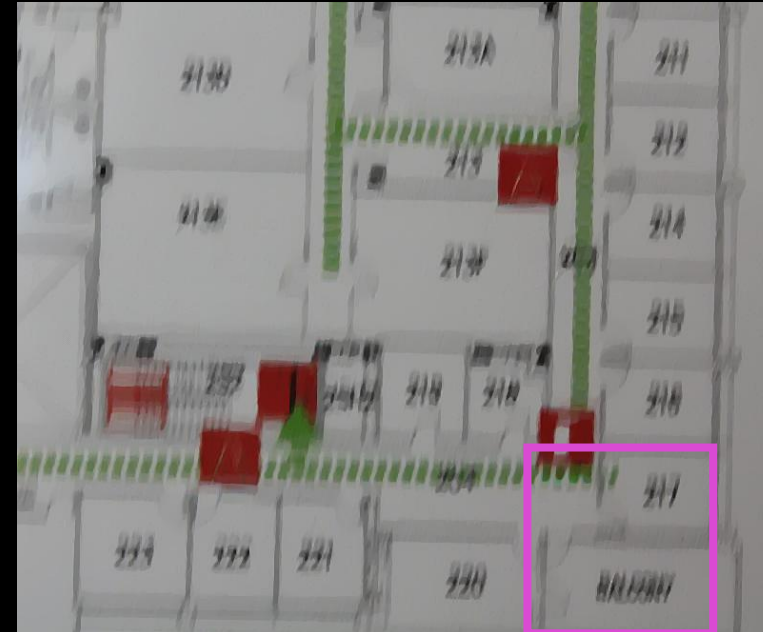

Kim and Lee [15]

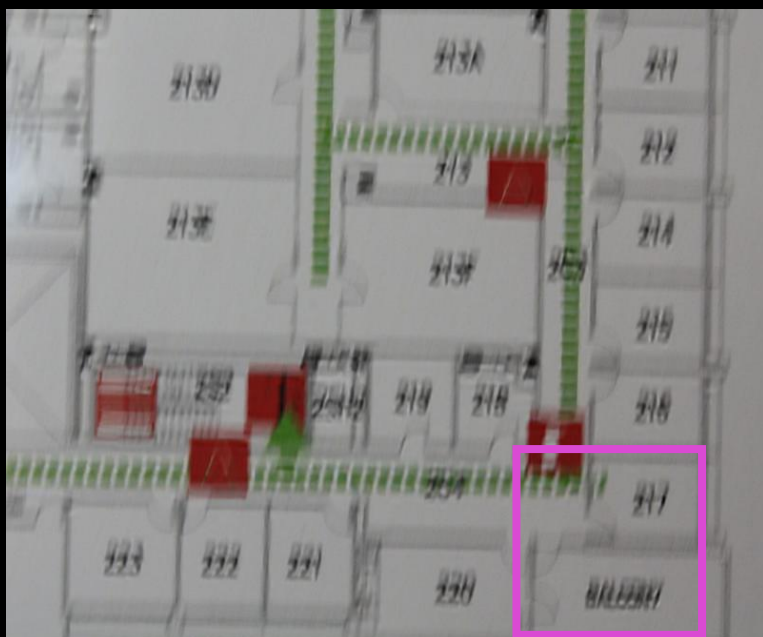

Sun et al. [27]

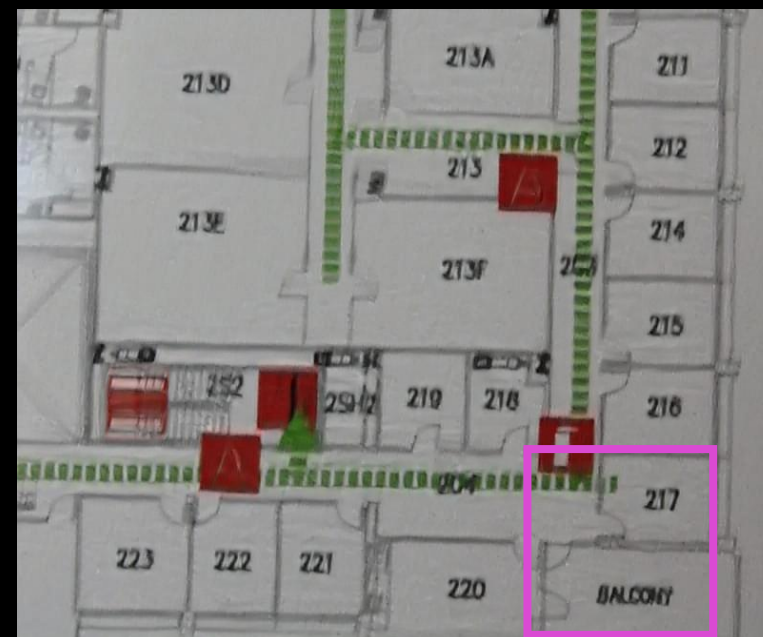

Ours



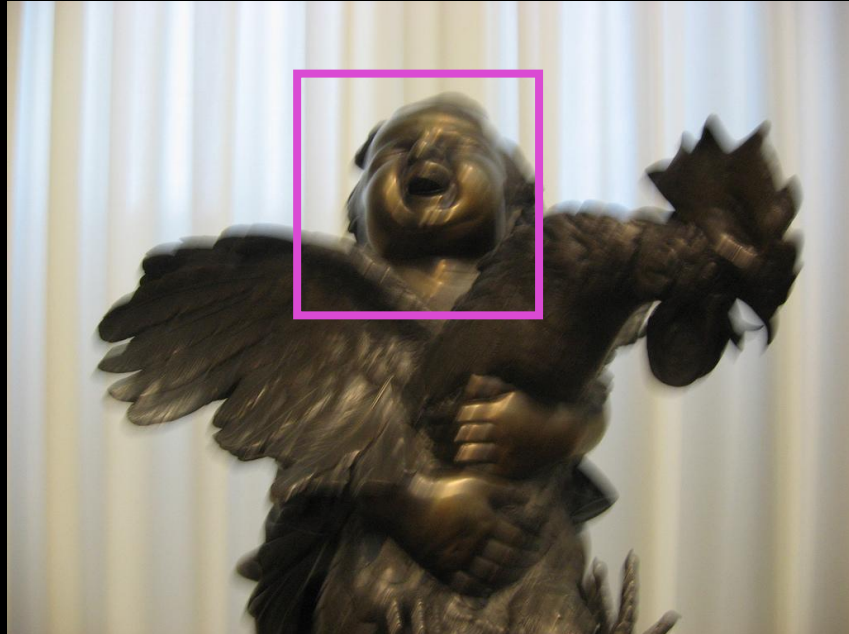

Blurry

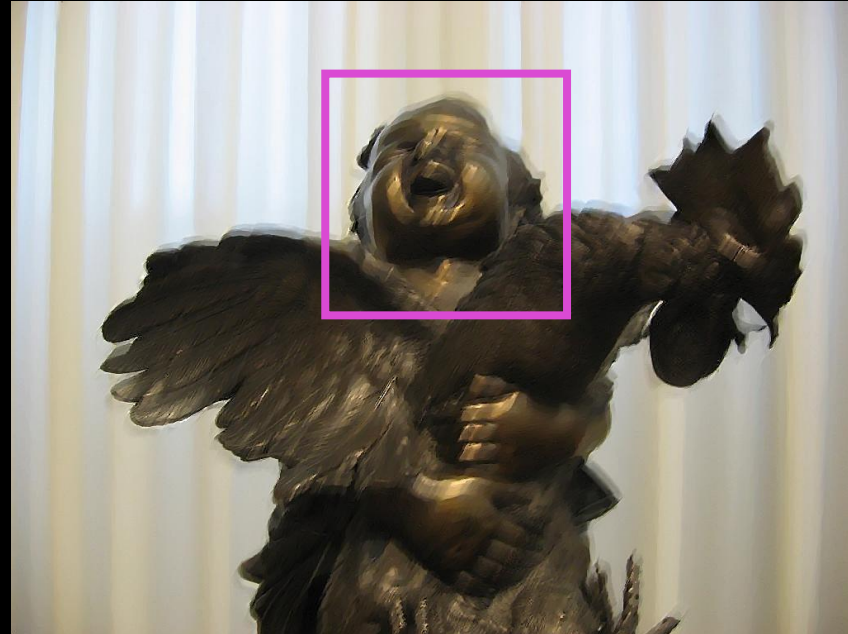

Kim and Lee [15]

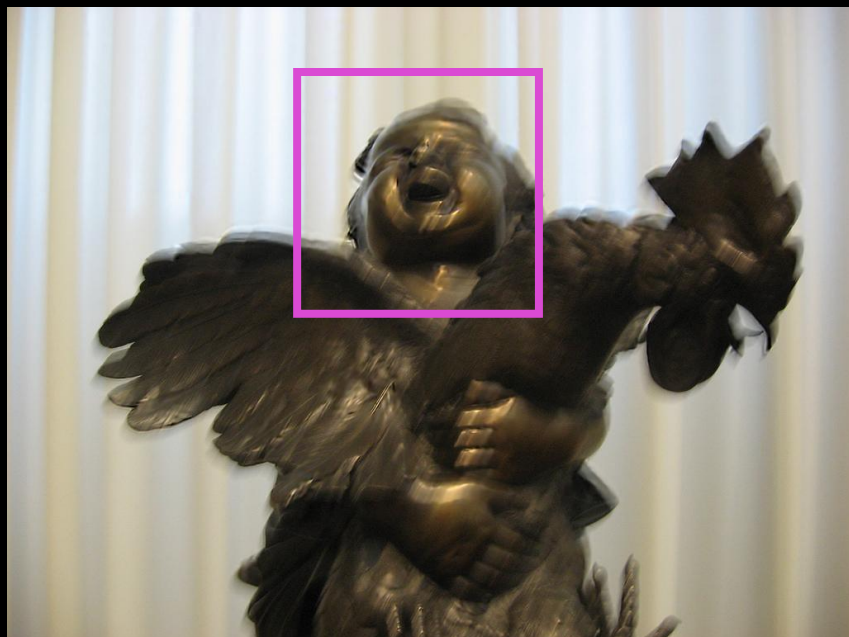

Sun et al. [27]

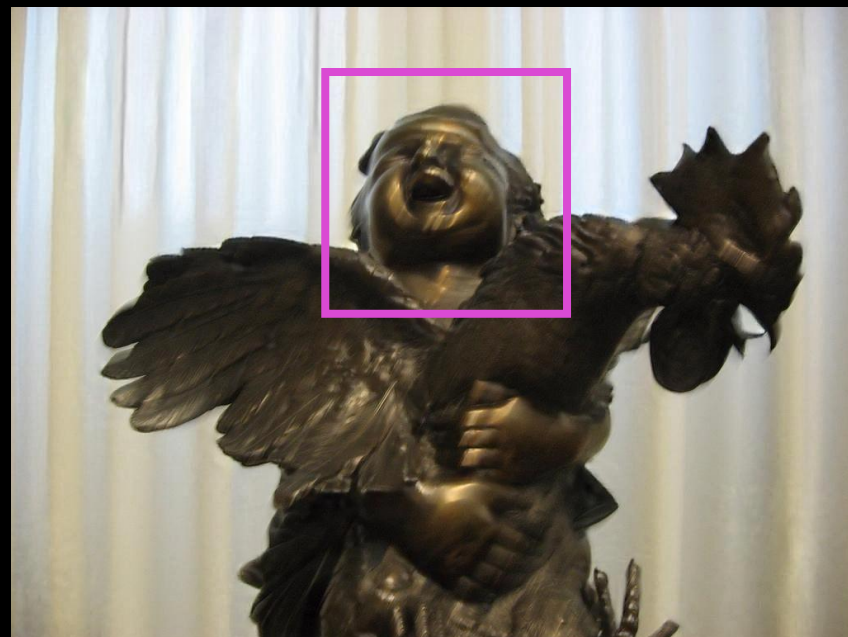

Ours

Blurry

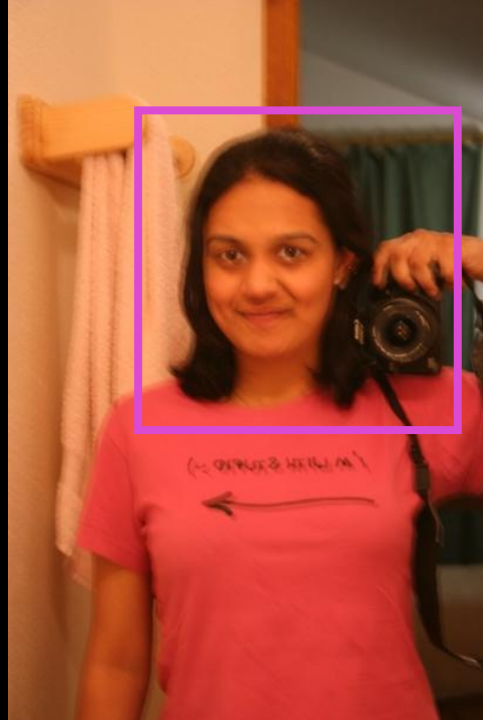

Kim and Lee [15]

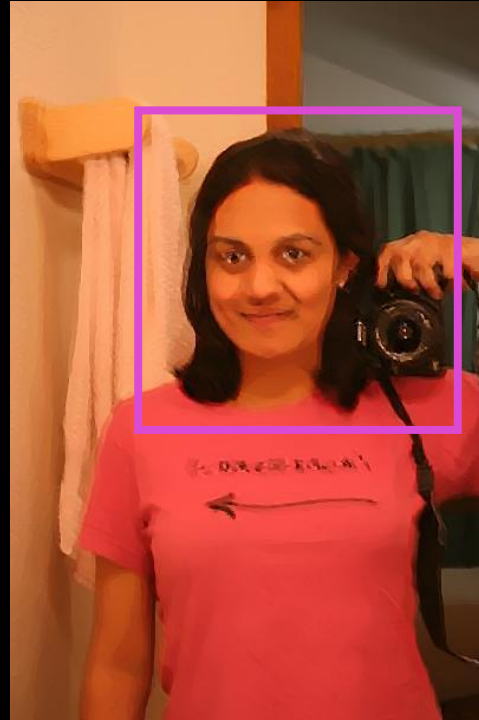

Sun et al. [27]

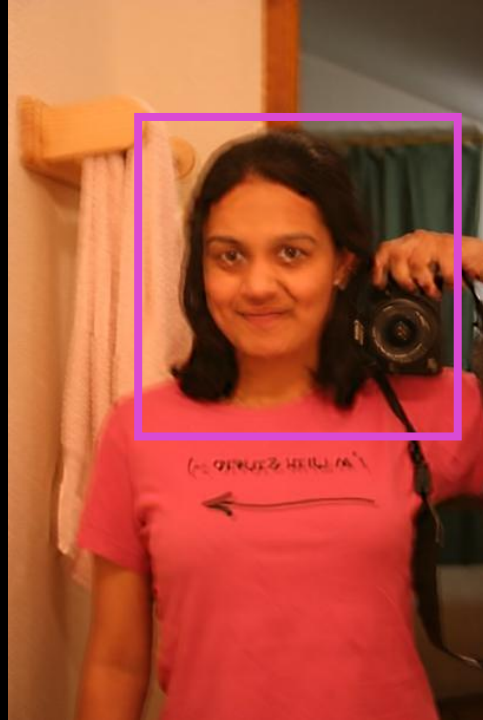

Ours

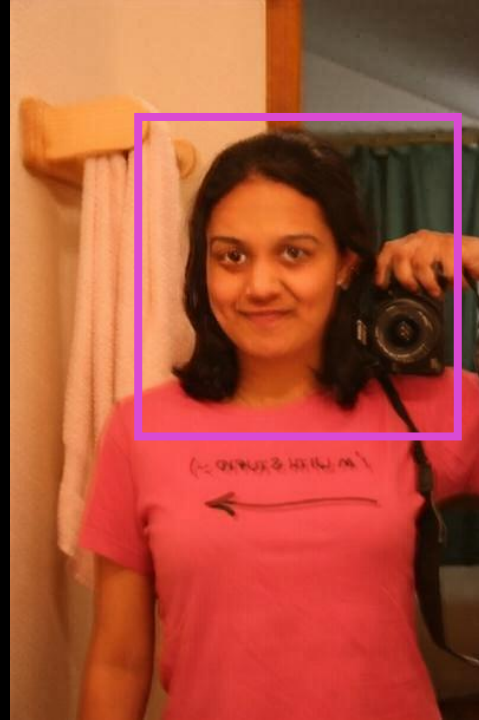



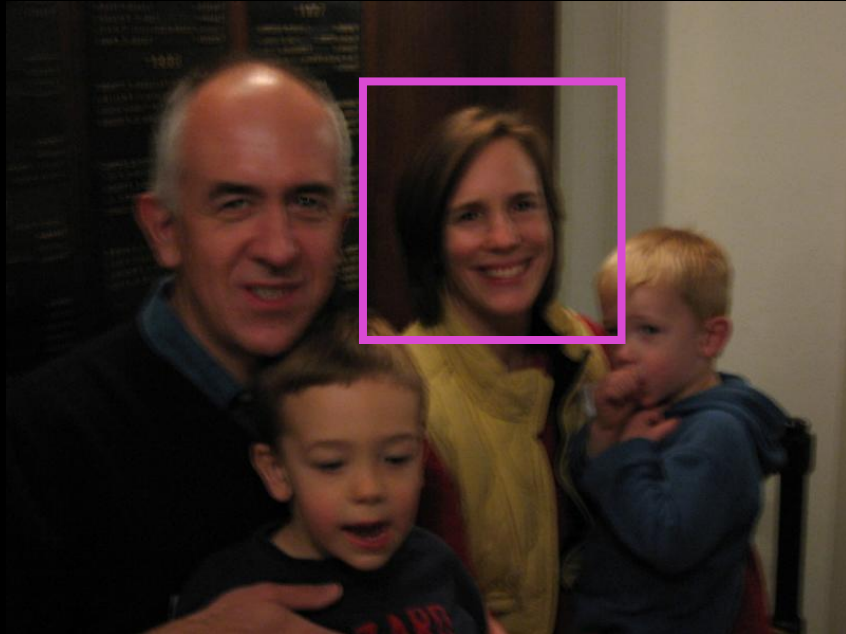

Blurry

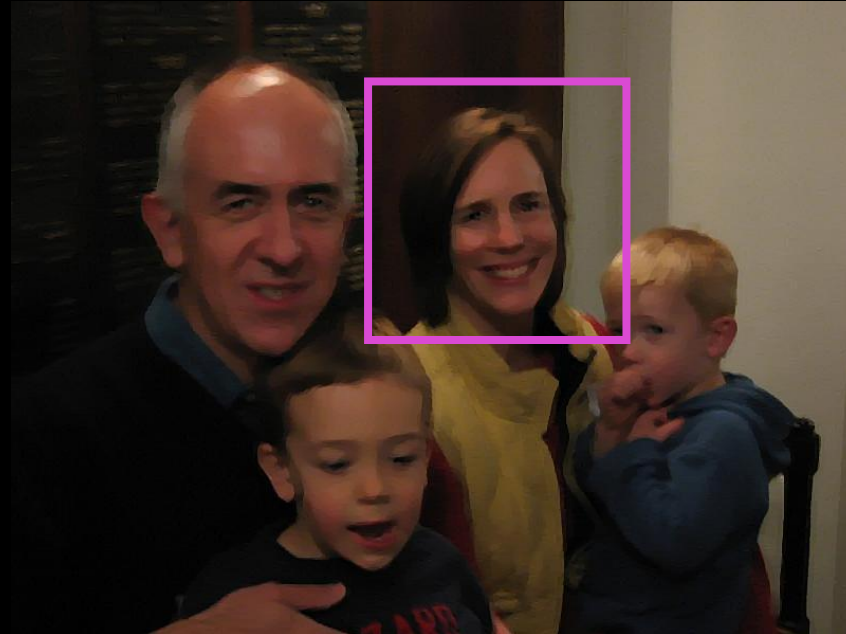

Kim and Lee [15]

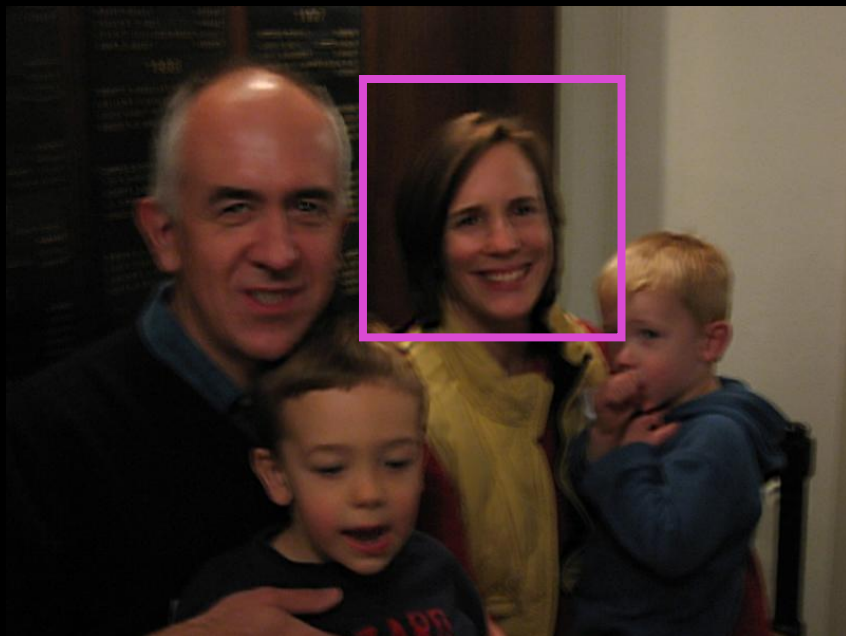

Sun et al. [27]

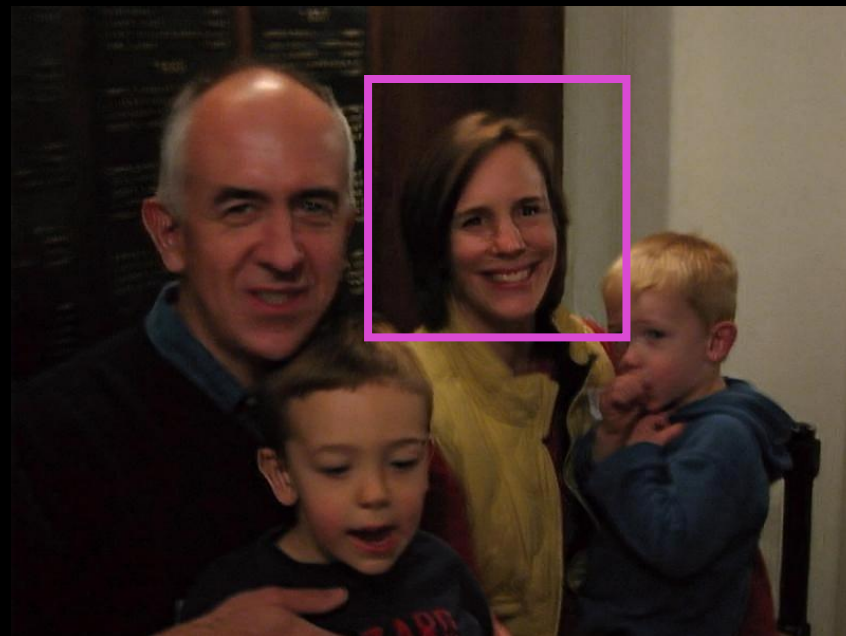

Ours

# Deblurring Result Comparison on Real Dynamic Scenes



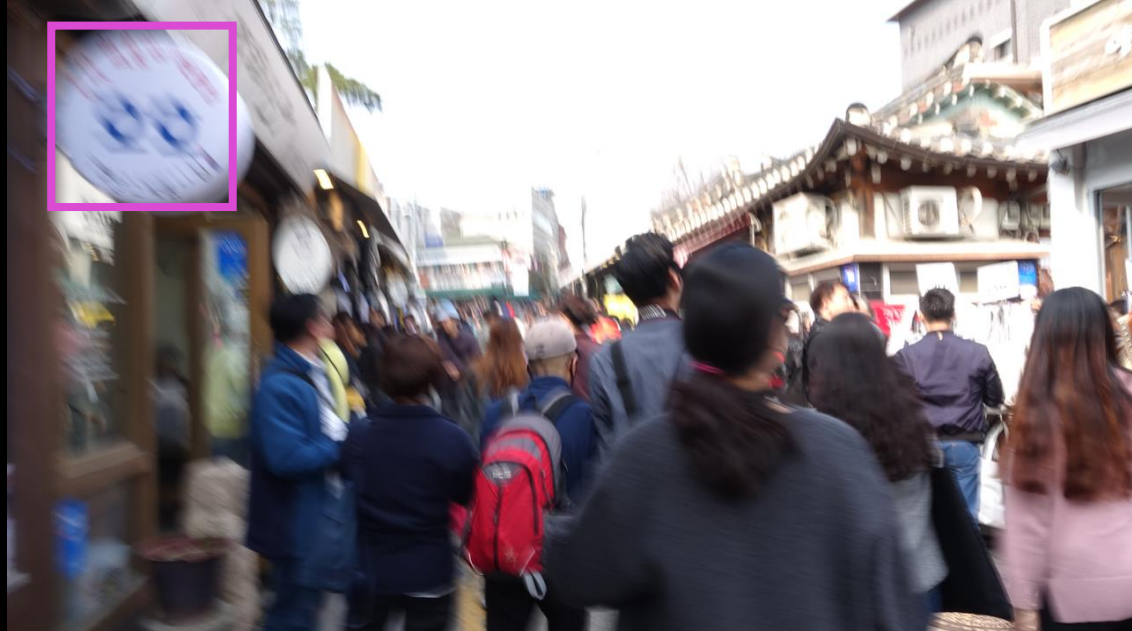

Blurry

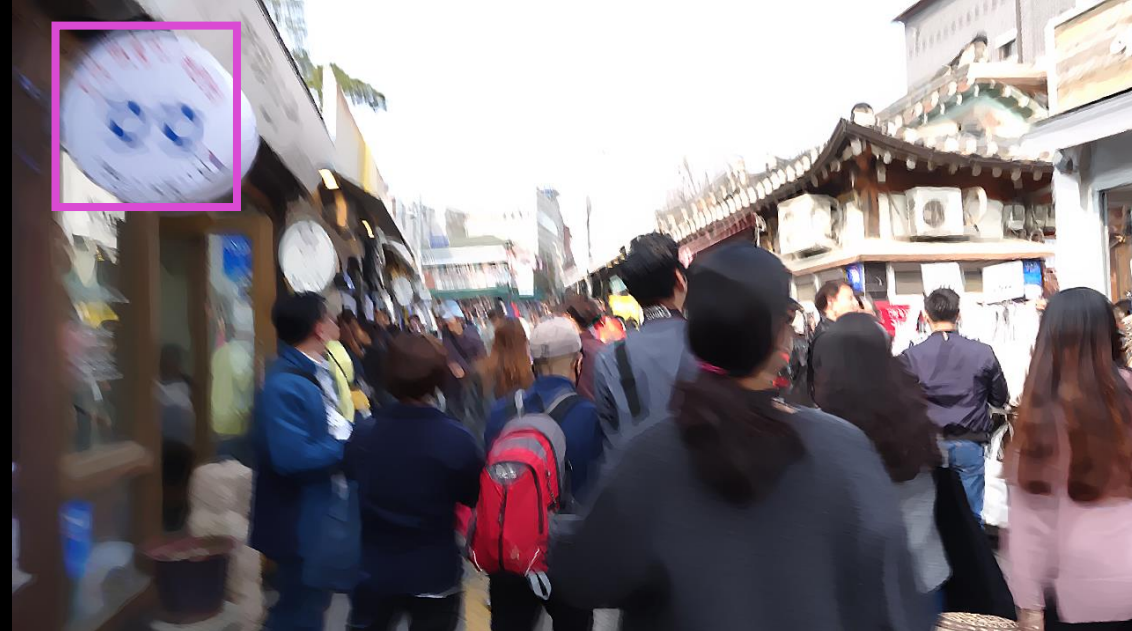

Kim and Lee [15]

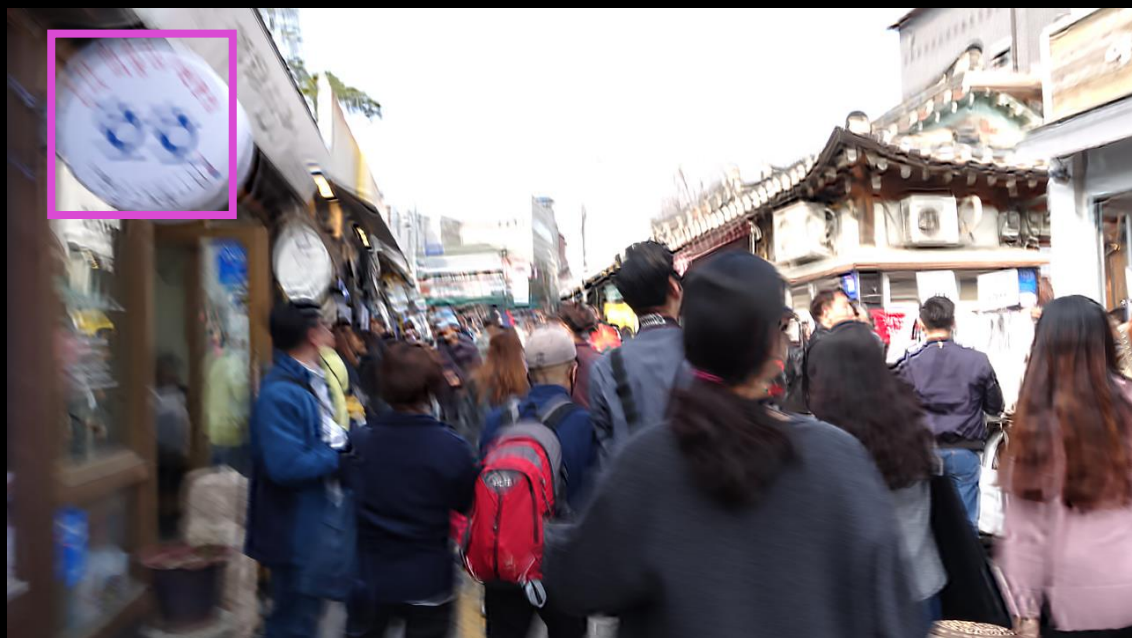

Sun et al. [27]

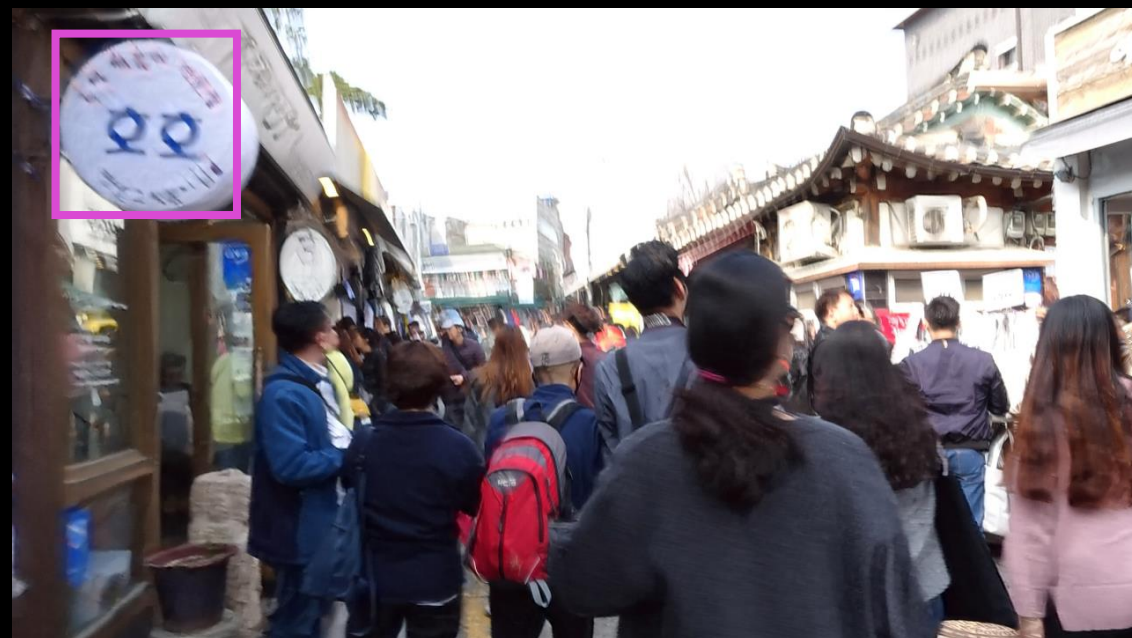

Ours



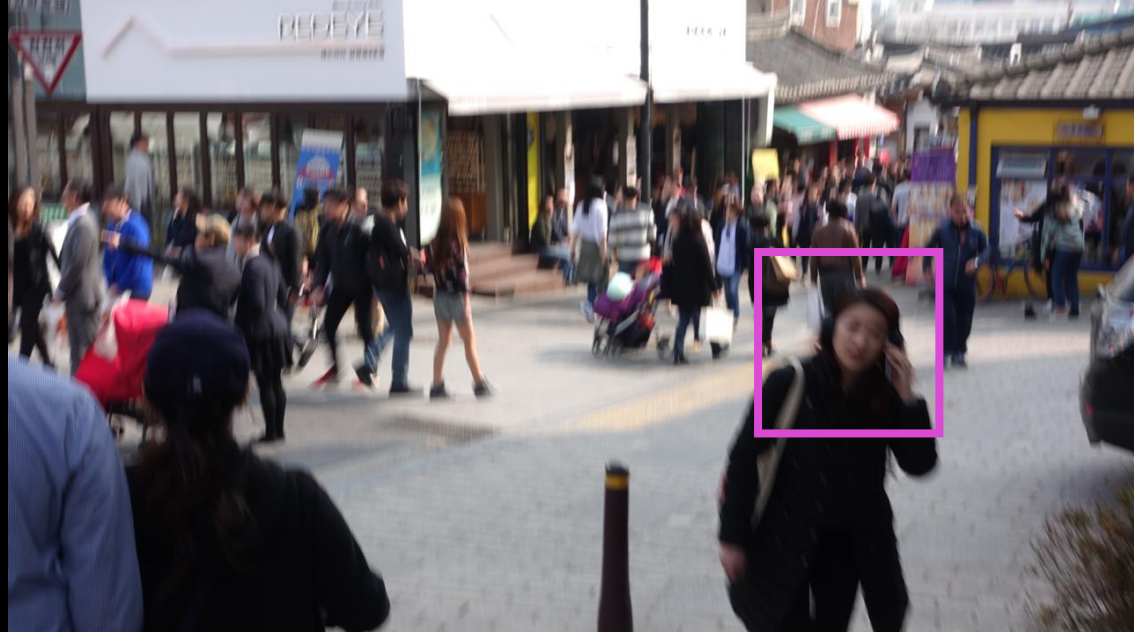

Blurry

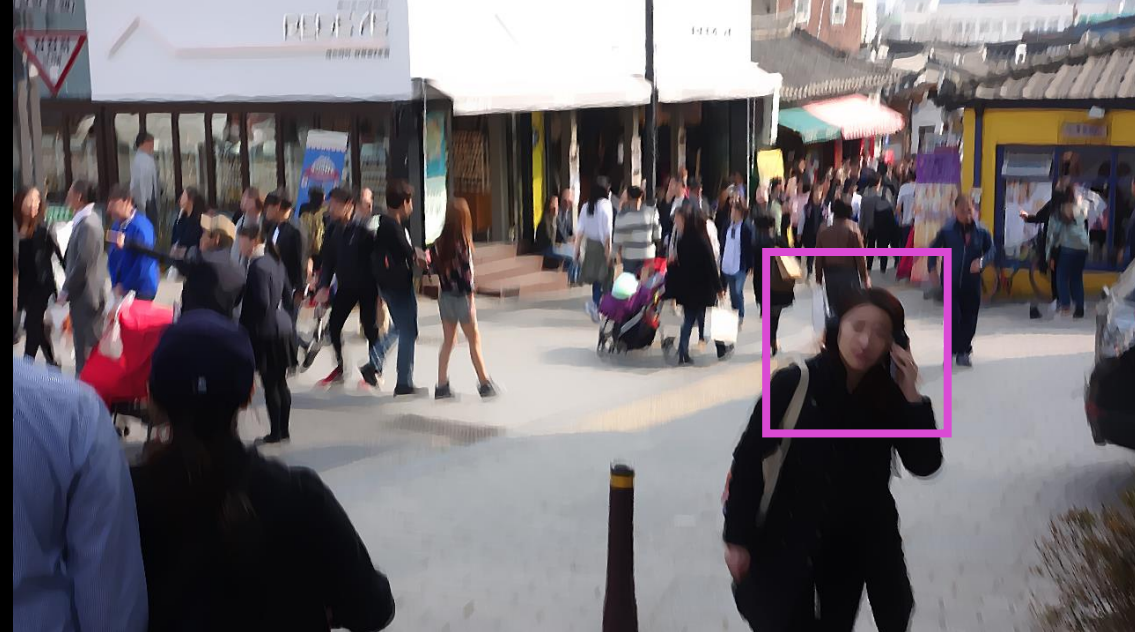

Kim and Lee [15]

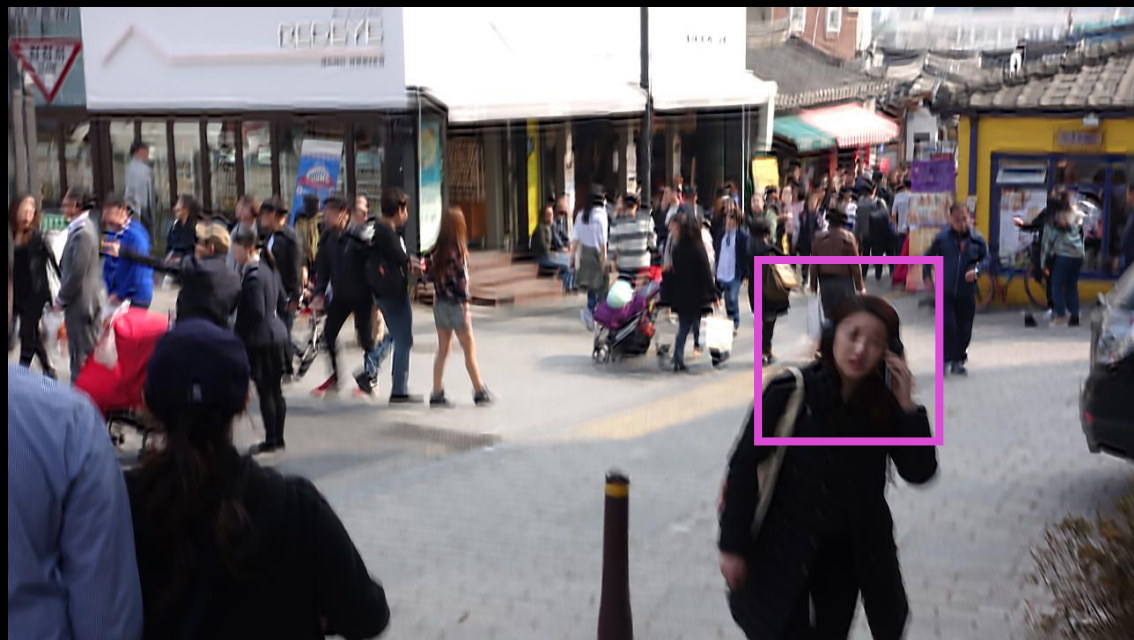

Sun et al. [27]

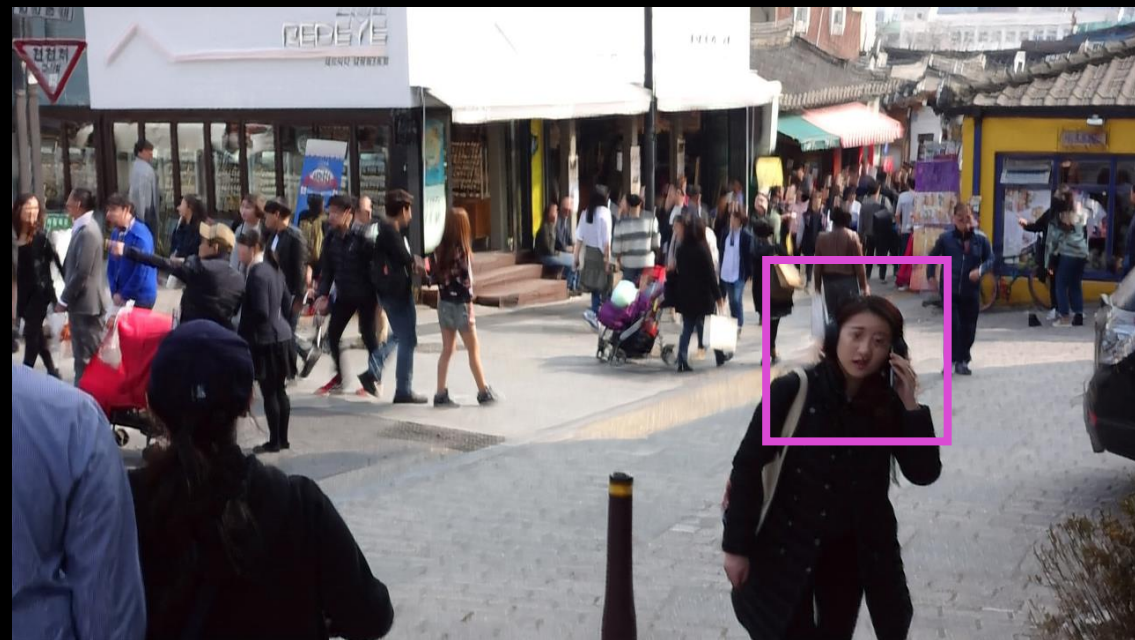

Ours



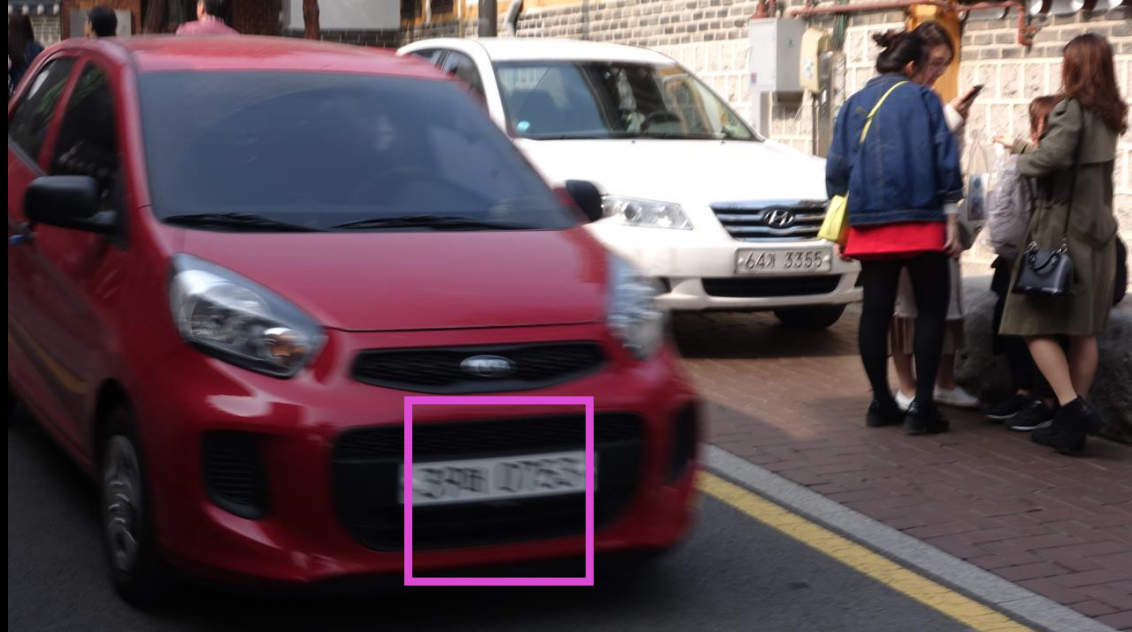

Blurry

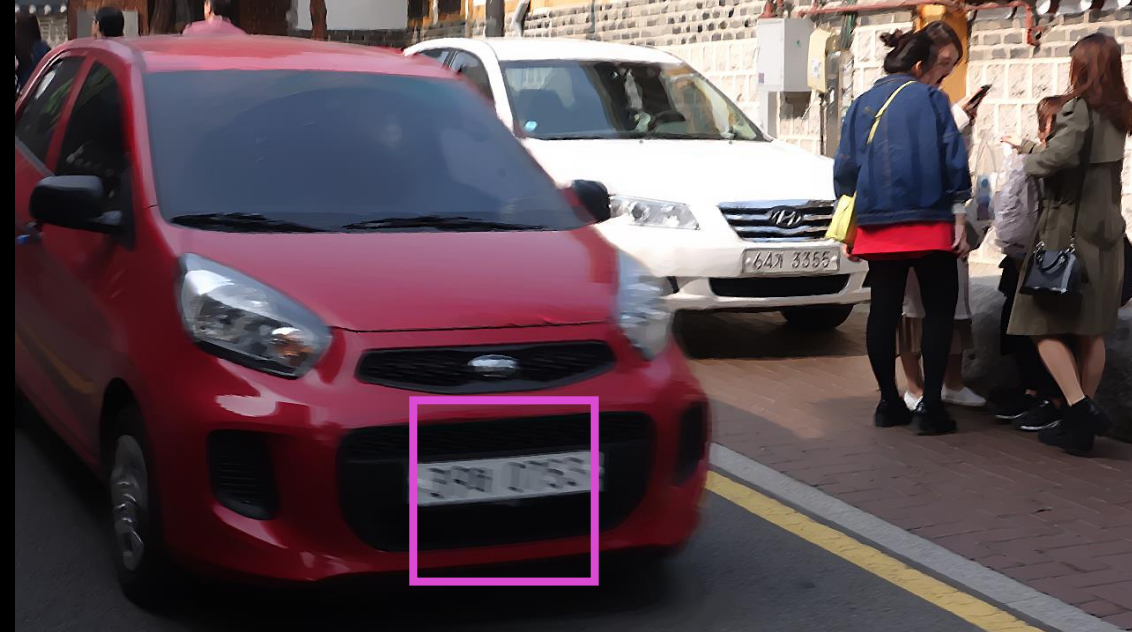

Kim and Lee [15]

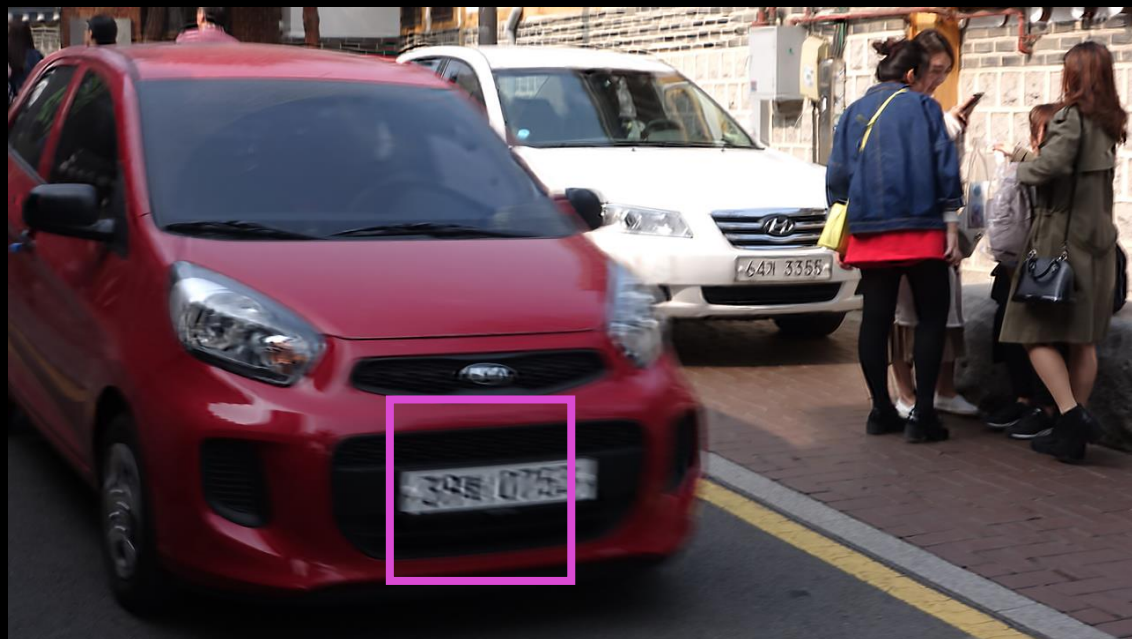

Sun et al. [27]

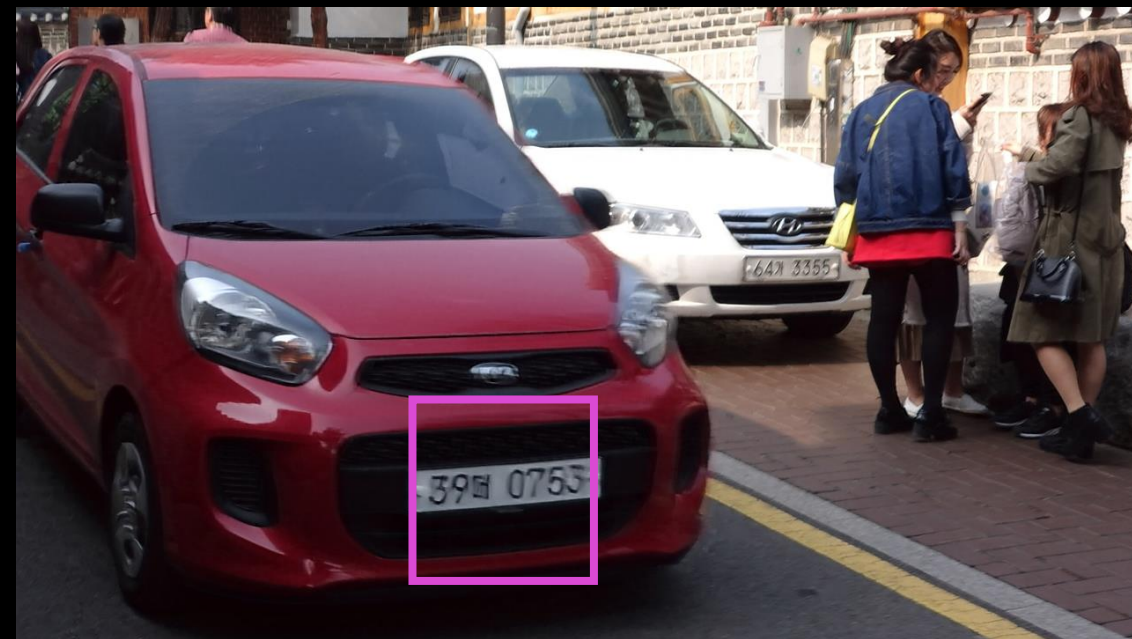

Ours



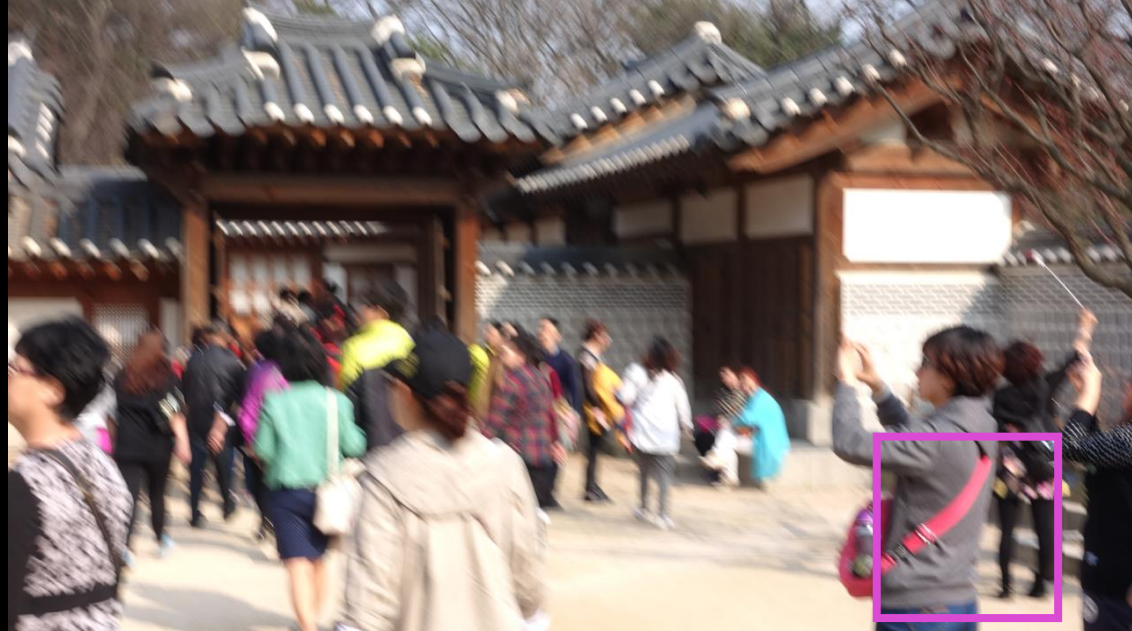

Blurry

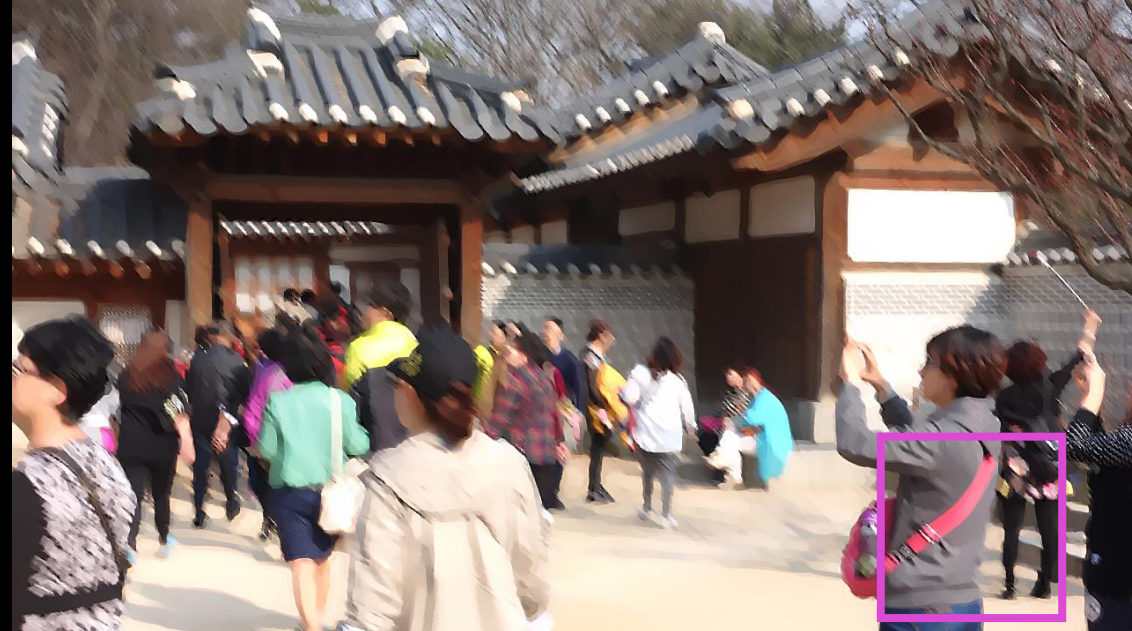

Kim and Lee [15]

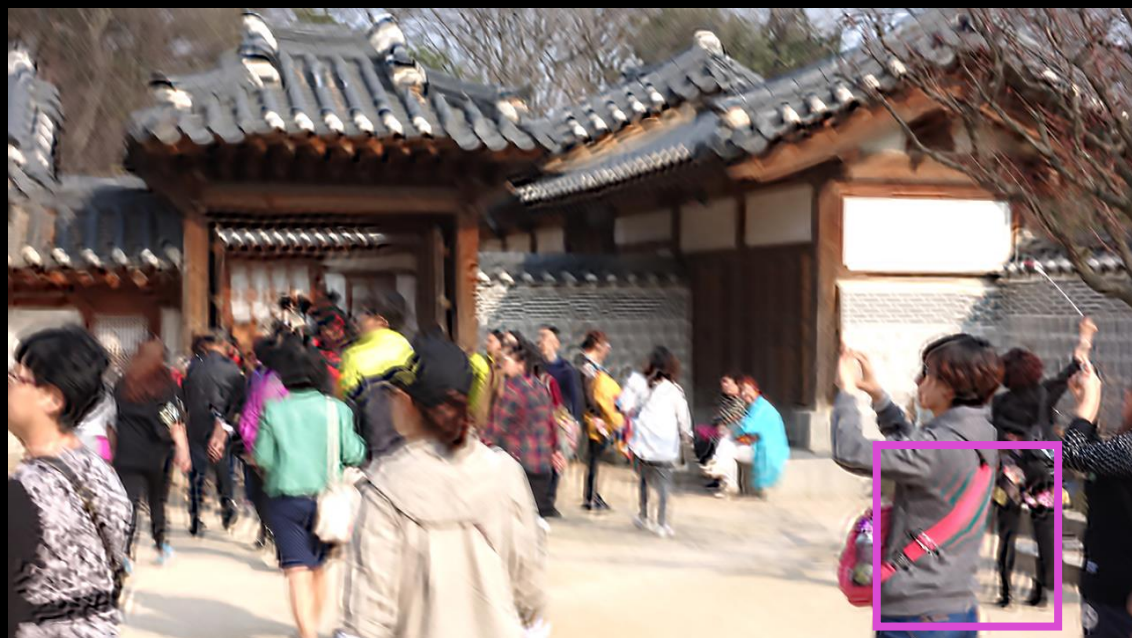

Sun et al. [27]

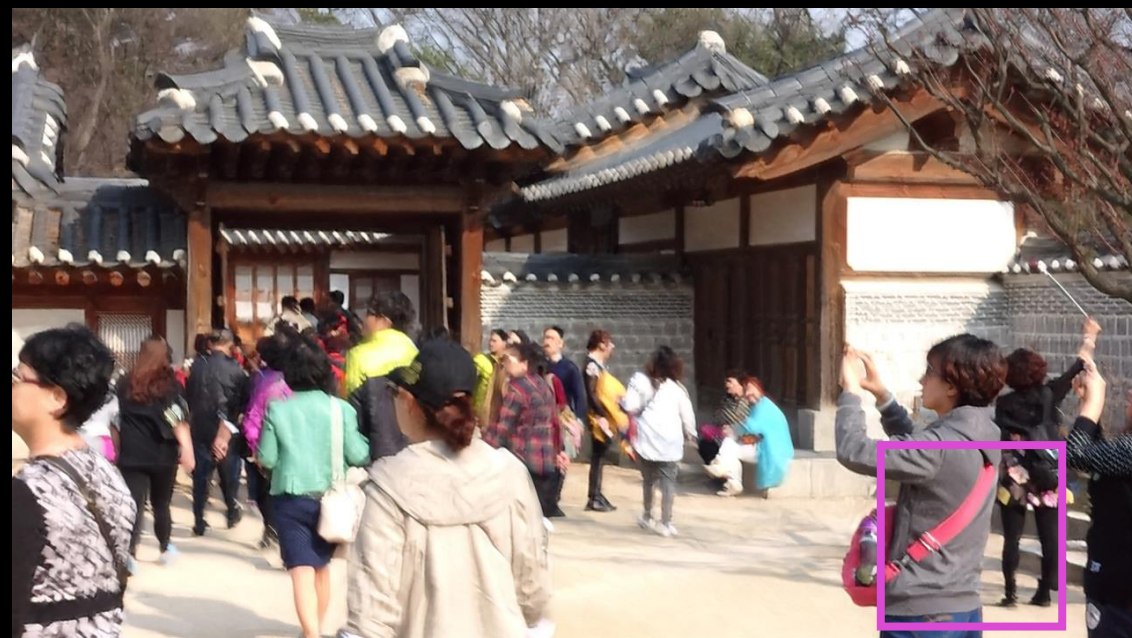

Ours



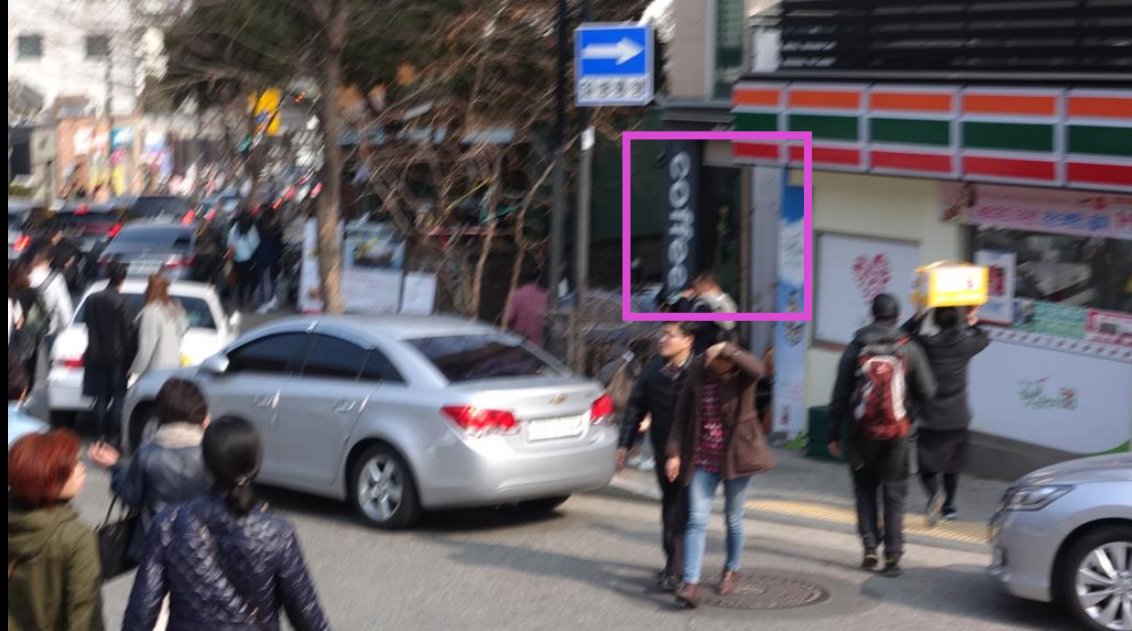

Blurry

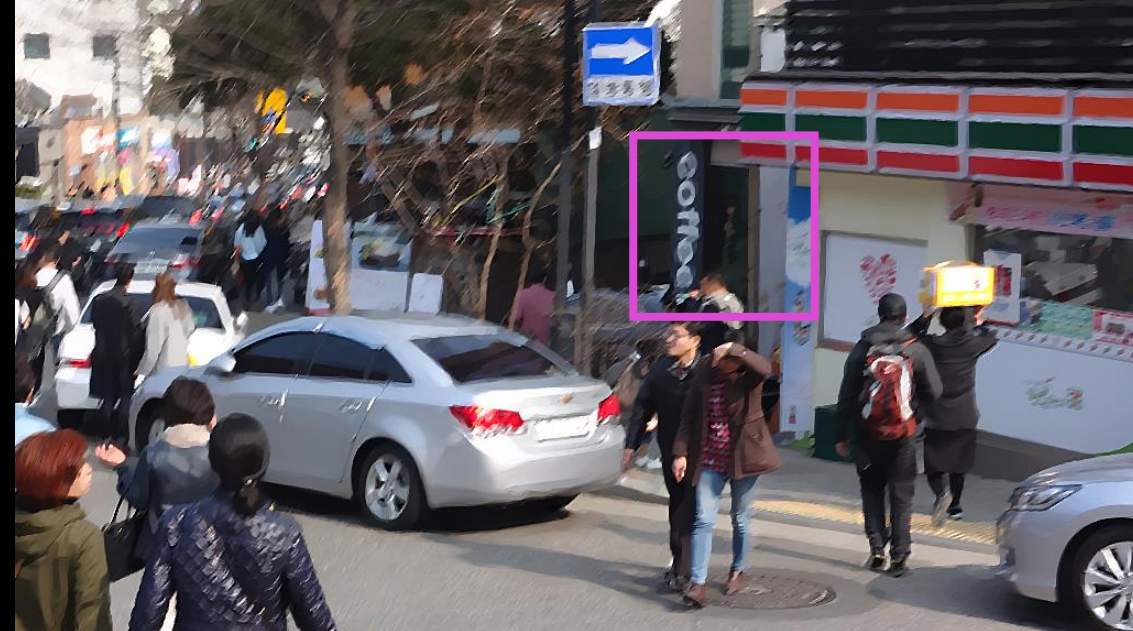

Kim and Lee [15]

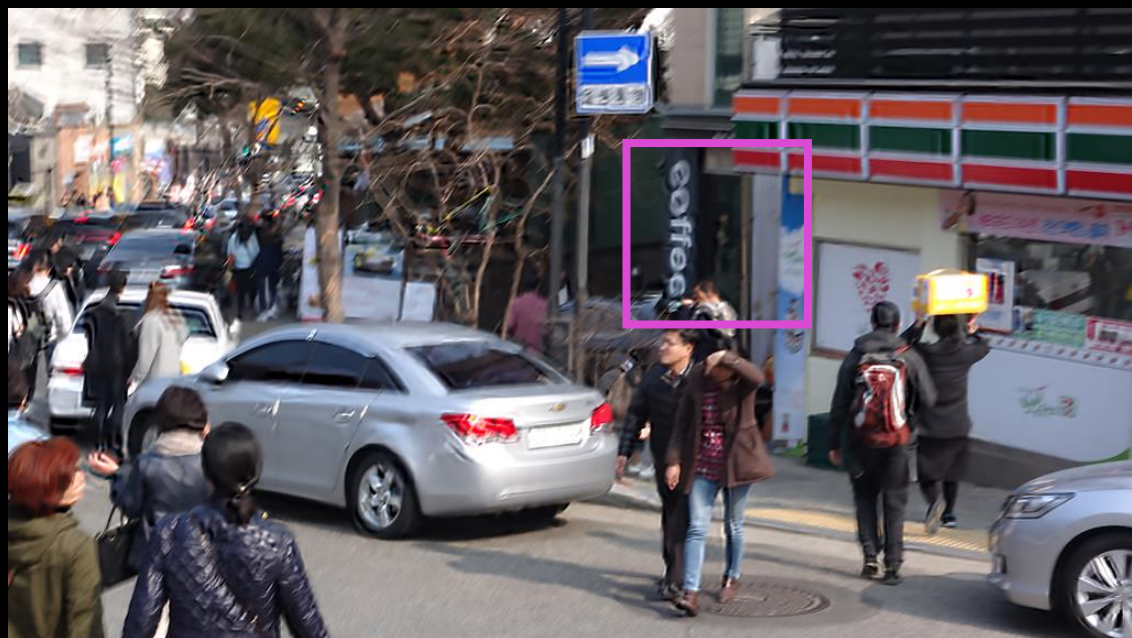

Sun et al. [27]

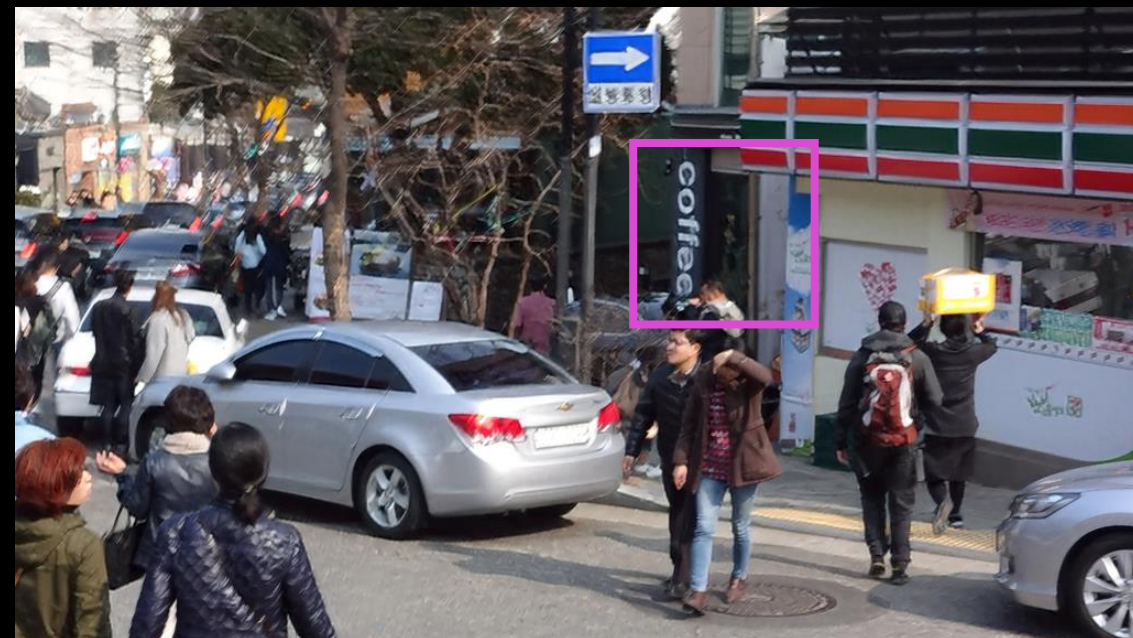

Ours



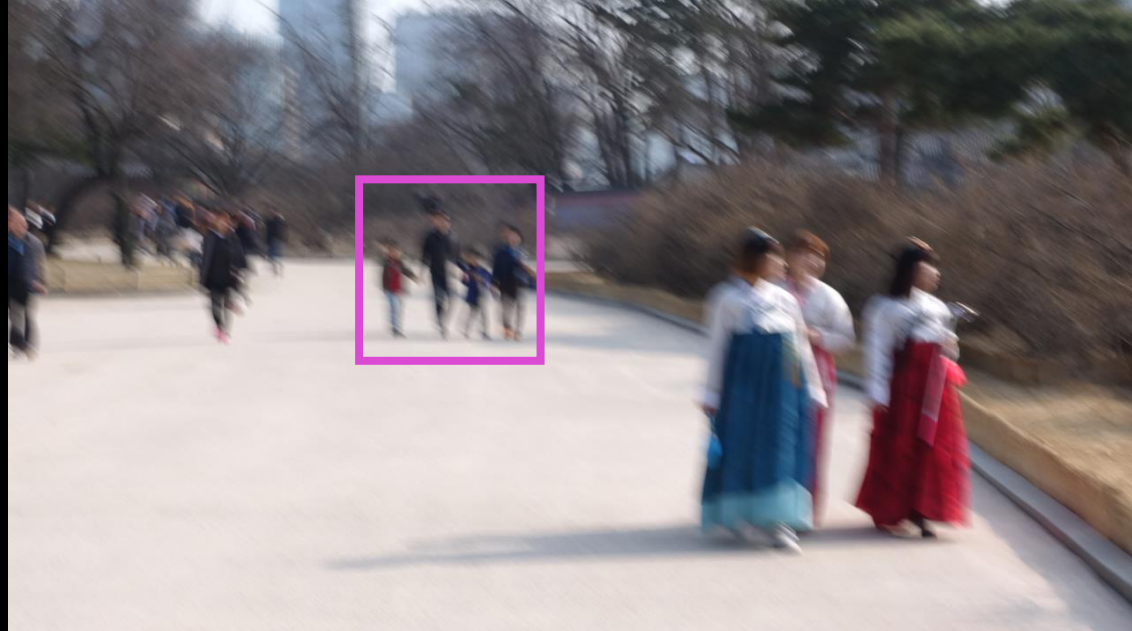

Blurry

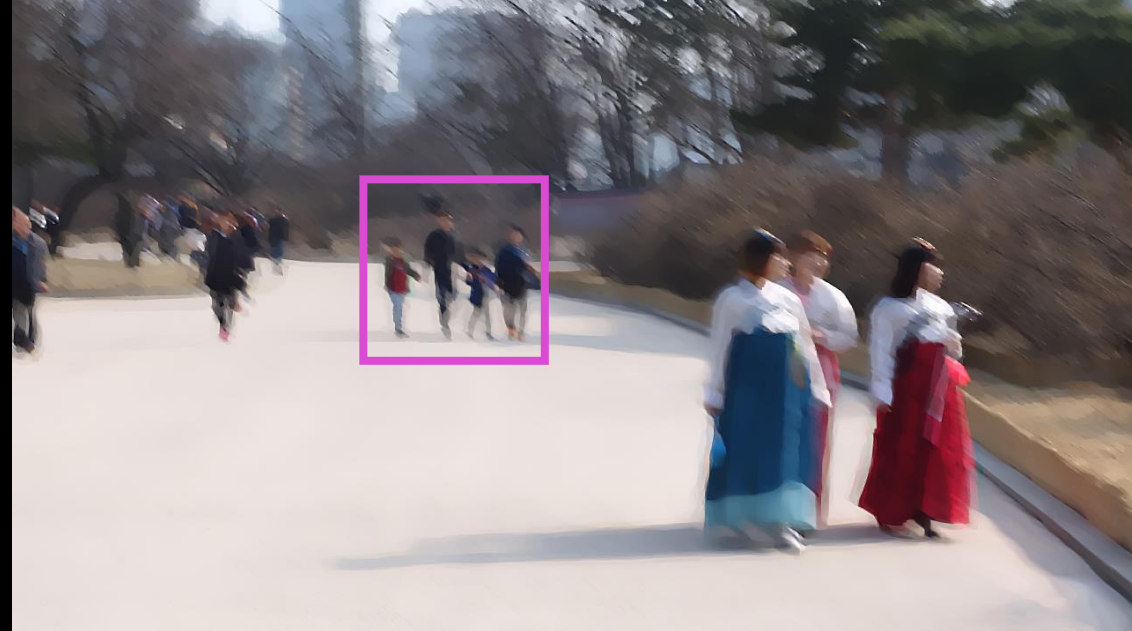

Kim and Lee [15]

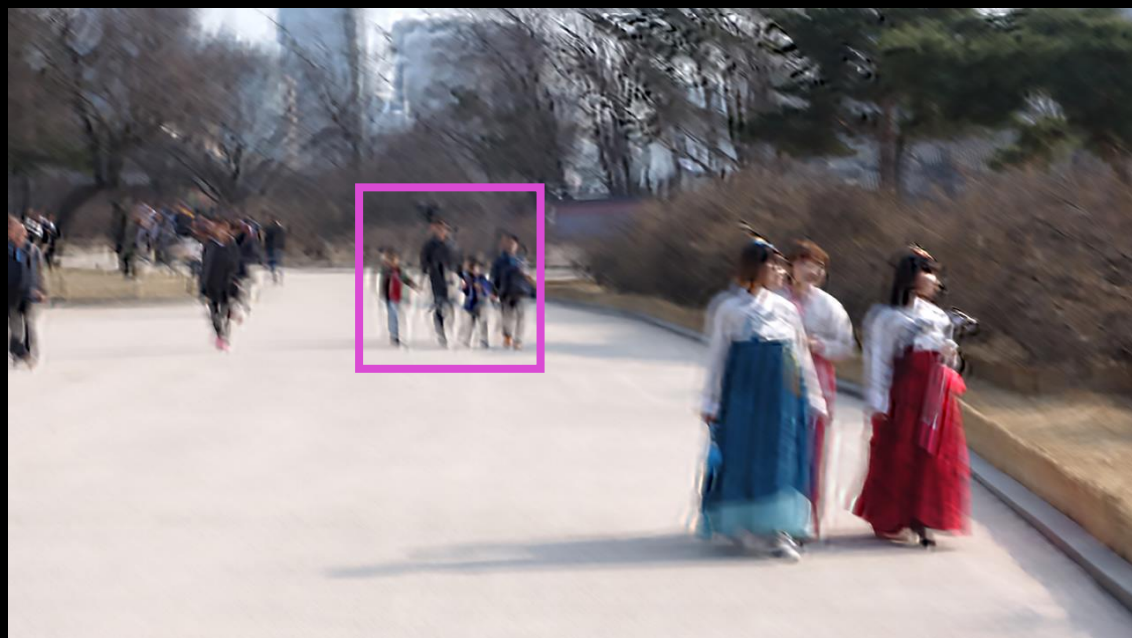

Sun et al. [27]

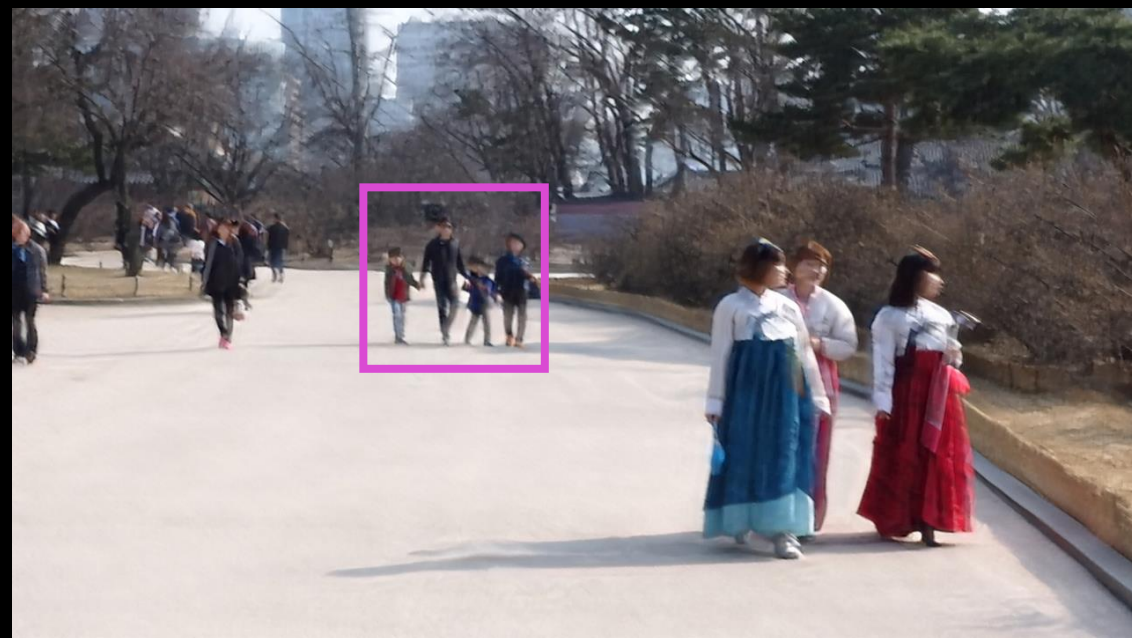

Ours



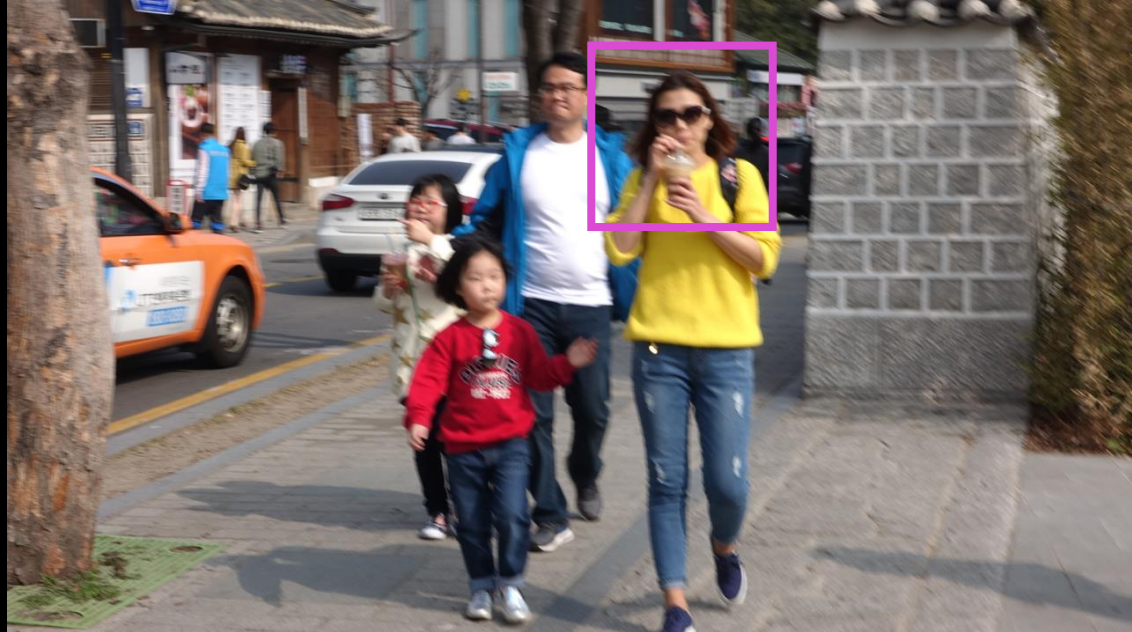

Blurry

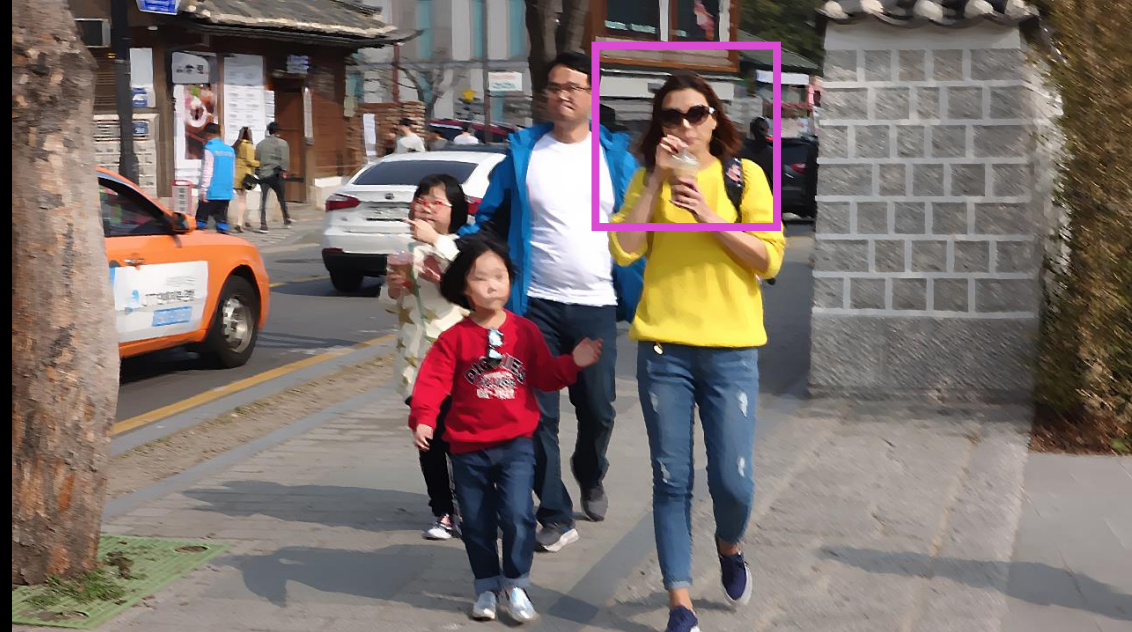

Kim and Lee [15]

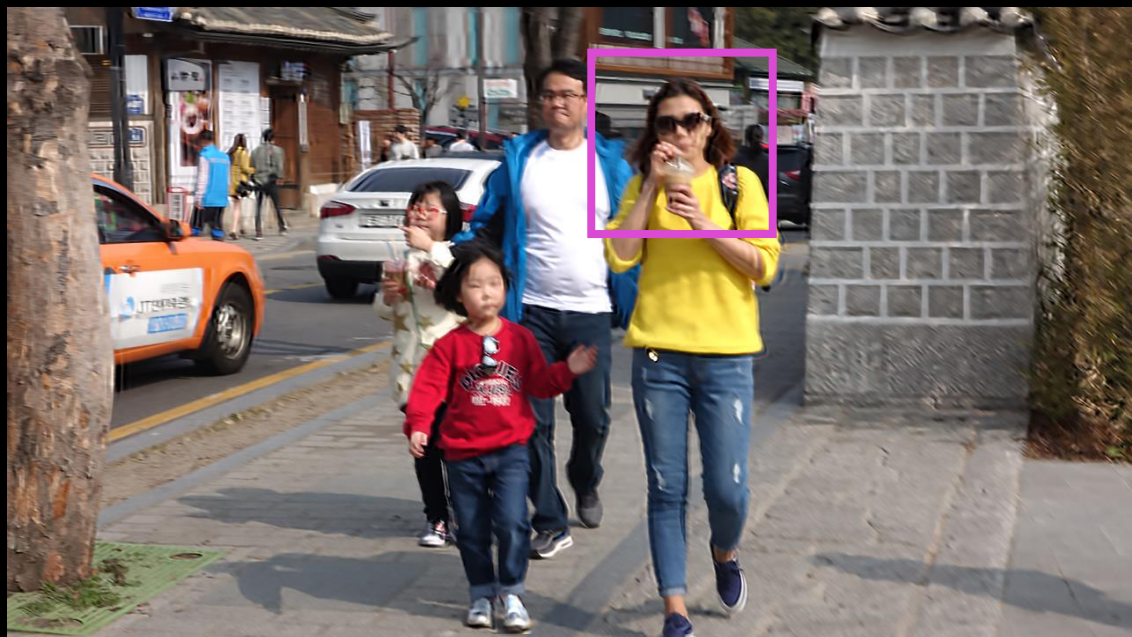

Sun et al. [27]

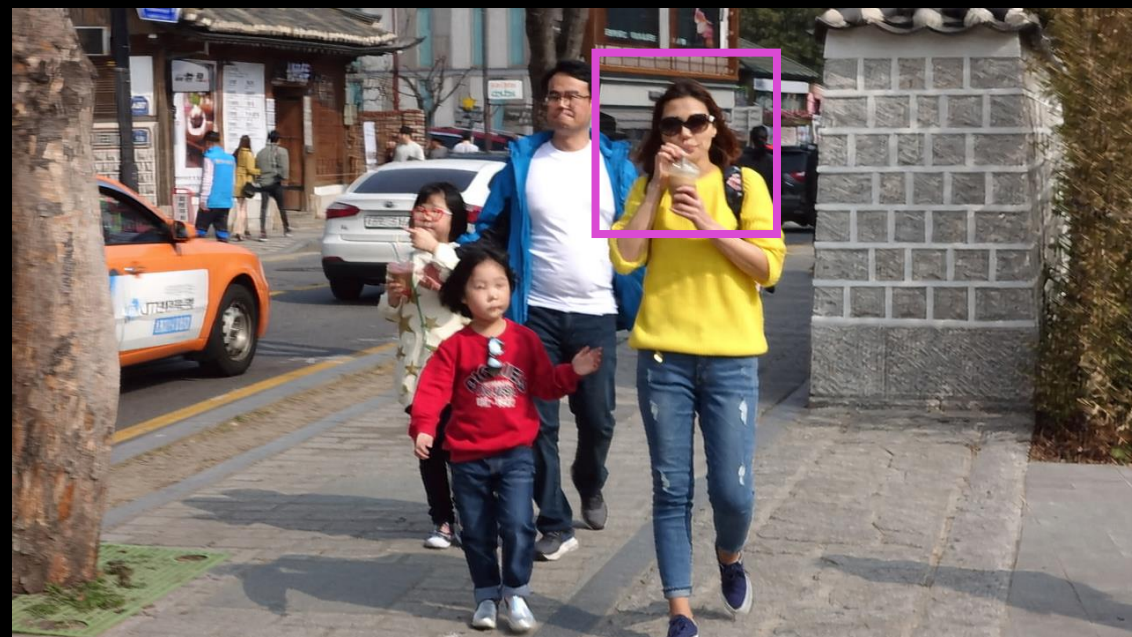

Ours

# References

- J. Sun, W. Cao, Z. Xu, and J. Ponce. Learning a convolutional neural network for non-uniform motion blur removal
- T. H. Ki and K. M. Lee. Segmentation-free dynamic scene deblurring.
- W.-S. Lai, J.-B Huang, Z. Hu, N. Ahuja, and M.-H. Yang. A comparative study for single image blind deblurring.
